# Supplementary material for: Gene Expression Profiles in Peripheral Blood Mononuclear Cells of Chinese Nickel Refinery Workers with High Exposures to Nickel and Control Subjects
Source: Oxford University Press journal article supplement (doi:10.1158/1055-9965.epi-12-1011), 2012-11-29
Supplement: 10559965epi121011-sup-tab1.xlsx [file 10559965epi121011-sup-tab1.xlsx]

## Sheet: Table S1
Gene name	Gene Symbol	Absolute Fold-change	Adjusted P-value
interleukin 1, alpha	IL1A	4.67553	0.000150659
chemokine (C-C motif) ligand 20	CCL20	4.20374	0.000128752
interleukin 6 (interferon, beta 2)	IL6	4.01525	2.74838e-05
major histocompatibility complex, class II, DQ beta 1	HLA-DQB1	3.74209	0.044503
serpin peptidase inhibitor, clade B (ovalbumin), member 2	SERPINB2	2.99324	0.00123771
chromosome 16 open reading frame 80	C16orf80	2.74111	2.74838e-05
intercellular adhesion molecule 1	ICAM1	2.49341	0.000312506
solute carrier family 7 (cationic amino acid transporter, y+ system), member 5	SLC7A5	2.46576	9.07636e-05
RasGEF domain family, member 1B	RASGEF1B	2.39968	0.000932529
epiregulin	EREG	2.36425	0.000312506
chromosome 13 open reading frame 15	C13orf15	2.34858	0.000289704
interleukin 1 receptor antagonist	IL1RN	2.32871	0.00087756
low density lipoprotein receptor	LDLR	2.23444	7.12214e-05
regulator of G-protein signaling 1	RGS1	2.22935	0.00188985
FBJ murine osteosarcoma viral oncogene homolog B	FOSB	2.13692	0.000986104
NLR family, pyrin domain containing 3	NLRP3	2.11748	0.00250587
chromosome 15 open reading frame 48	C15orf48	2.09475	0.00910166
dual specificity phosphatase 10	DUSP10	2.0932	0.000362236
phorbol-12-myristate-13-acetate-induced protein 1	PMAIP1	2.04904	0.00143947
polo-like kinase 3	PLK3	2.04599	0.000382498
zinc finger CCCH-type containing 12A	ZC3H12A	2.03348	0.000205924
interleukin 23, alpha subunit p19	IL23A	2.0235	0.000342033
SMAD family member 7	SMAD7	1.97508	0.00167984
lamin A/C	LMNA	1.97428	0.00021151
interleukin 1, beta	IL1B	1.95254	0.000274495
intermediate filament family orphan 2	IFFO2	1.95101	0.000151632
complement component 2	C2	1.94899	0.0185358
chemokine (C-C motif) ligand 4	CCL4	1.93928	0.025977
period homolog 1 (Drosophila)	PER1	1.93437	0.000200566
junction mediating and regulatory protein, p53 cofactor	JMY	1.92634	4.48886e-05
6-phosphofructo-2-kinase/fructose-2,6-biphosphatase 3	PFKFB3	1.91609	0.000579356
nuclear receptor subfamily 4, group A, member 2	NR4A2	1.88999	0.00157383
ninjurin 1	NINJ1	1.88918	0.000261386
ADP-ribosylation factor-like 4A	ARL4A	1.87658	0.00287509
interferon, gamma	IFNG	1.87283	0.0319597
G protein-coupled receptor 84	GPR84	1.86481	0.00535487
microRNA 21	MIR21	1.85824	0.0130186
thrombospondin 1	THBS1	1.85474	0.0163321
myeloid-associated differentiation marker	MYADM	1.84686	0.000312506
CCR4 carbon catabolite repression 4-like (S. cerevisiae)	CCRN4L	1.83887	0.000901738
coagulation factor III (thromboplastin, tissue factor)	F3	1.83551	0.00132002
phosphatidylinositol glycan anchor biosynthesis, class A	PIGA	1.83214	0.000342033
cofilin 2 (muscle)	CFL2	1.82448	0.00222408
small nucleolar RNA, C/D box 74	SNORD74	1.80206	0.000128752
zinc finger and BTB domain containing 43	ZBTB43	1.79769	0.000323468
ermin, ERM-like protein	ERMN	1.79267	0.000122222
DNA-damage-inducible transcript 3	DDIT3	1.78379	0.000691659
enkurin, TRPC channel interacting protein	ENKUR	1.7788	0.0110969
KIAA0664-like 3	KIAA0664L3	1.76842	8.87012e-05
p21 protein (Cdc42/Rac)-activated kinase 1	PAK1	1.76519	0.00334097
zinc finger protein 331	ZNF331	1.74995	0.000193516
WAS protein homolog associated with actin, golgi membranes and microtubules	WHAMM	1.74234	0.000382498
nuclear receptor subfamily 4, group A, member 3	NR4A3	1.74038	0.0125807
TAP binding protein (tapasin)	TAPBP	1.73999	0.0100867
nuclear factor of kappa light polypeptide gene enhancer in B-cells inhibitor, delta	NFKBID	1.72965	0.00097212
GABA(A) receptor-associated protein like 1	GABARAPL1	1.72211	0.00127256
mitogen-activated protein kinase 6	MAPK6	1.7212	0.000890405
DEAD/H (Asp-Glu-Ala-Asp/His) box polypeptide 11 like 2	DDX11L2	1.72041	0.0265095
ring finger protein 19B	RNF19B	1.71912	0.000589591
CD69 molecule	CD69	1.71058	0.000652804
epithelial membrane protein 1	EMP1	1.70918	0.00187772
B-cell CLL/lymphoma 3	BCL3	1.7043	0.00123771
corepressor interacting with RBPJ, 1	CIR1	1.69829	0.000138035
interleukin-1 receptor-associated kinase 2	IRAK2	1.69792	0.000868887
dual specificity phosphatase 8	DUSP8	1.69376	0.00023506
chromosome 1 open reading frame 55	C1orf55	1.69324	0.000227044
zinc finger protein 267	ZNF267	1.6897	0.00365096
family with sequence similarity 46, member C	FAM46C	1.68681	0.0195715
cryptochrome 1 (photolyase-like)	CRY1	1.68197	0.00107537
zinc finger, DBF-type containing 2	ZDBF2	1.68134	0.00584117
pellino homolog 1 (Drosophila)	PELI1	1.67632	0.00090287
serpin peptidase inhibitor, clade B (ovalbumin), member 9 pseudogene	MGC39372	1.67576	0.00387771
NIPA-like domain containing 4	NIPAL4	1.66675	0.00102966
myristoylated alanine-rich protein kinase C substrate	MARCKS	1.66633	0.000391491
selenoprotein K	SELK	1.6595	2.74838e-05
potassium inwardly-rectifying channel, subfamily J, member 2	KCNJ2	1.65765	0.000573007
RAB30, member RAS oncogene family	RAB30	1.65547	0.0336208
C-type lectin domain family 1, member B	CLEC1B	1.65133	0.0283184
hypothetical protein DKFZp686O24166	DKFZp686O24166	1.64398	0.00270823
GATA binding protein 3	GATA3	1.6422	0.000193159
G protein-coupled receptor 132	GPR132	1.64185	0.00164454
family with sequence similarity 115, member C	FAM115C	1.63779	0.00148004
rearranged L-myc fusion	RLF	1.63648	0.000520912
v-rel reticuloendotheliosis viral oncogene homolog B	RELB	1.63289	0.00408873
pim-3 oncogene	PIM3	1.62911	0.0024663
major facilitator superfamily domain containing 2A	MFSD2A	1.6284	0.0019213
zinc finger protein 136	ZNF136	1.62647	0.00114556
hippocampus abundant transcript 1	HIAT1	1.62432	0.000142938
growth arrest and DNA-damage-inducible, beta	GADD45B	1.62359	0.00487368
3-hydroxy-3-methylglutaryl-CoA synthase 1 (soluble)	HMGCS1	1.61336	0.00370745
SH3 domain binding glutamic acid-rich protein like 2	SH3BGRL2	1.61189	0.0339161
serum deprivation response	SDPR	1.61034	0.0168795
zinc finger and BTB domain containing 5	ZBTB5	1.60515	0.000863379
Josephin domain containing 1	JOSD1	1.60159	0.000860916
RNA binding protein with multiple splicing 2	RBPMS2	1.60009	0.0196577
DnaJ (Hsp40) homolog, subfamily B, member 1	DNAJB1	1.59874	0.00721879
myeloid leukemia factor 1	MLF1	1.5971	0.00290514
salt-inducible kinase 1	SIK1	1.59436	0.00586938
CD83 molecule	CD83	1.59428	0.000520912
zinc finger protein 295	ZNF295	1.59293	0.00323805
pleckstrin homology-like domain, family A, member 1	PHLDA1	1.59246	0.002865
SAM domain, SH3 domain and nuclear localization signals 1	SAMSN1	1.58146	0.0107701
jun proto-oncogene	JUN	1.5808	0.0156048
ras homolog gene family, member H	RHOH	1.57235	0.000658421
zinc finger and BTB domain containing 10	ZBTB10	1.57205	0.00478939
inhibitor of DNA binding 1, dominant negative helix-loop-helix protein	ID1	1.57068	0.0067826
TAP binding protein (tapasin)	TAPBP	1.57	0.000348619
BTG family, member 3	BTG3	1.56615	0.000652804
TSPY-like 2	TSPYL2	1.5647	0.0210154
hypothetical LOC649446	FLJ35776	1.56156	0.000291354
triggering receptor expressed on myeloid cells-like 1	TREML1	1.55926	0.0395585
eukaryotic translation initiation factor 1B	EIF1B	1.55725	0.00200279
sterile alpha motif domain containing 8	SAMD8	1.55543	0.00136655
BEN domain containing 2	BEND2	1.55527	0.0443801
histidine decarboxylase	HDC	1.55464	0.00507624
chromosome 9 open reading frame 21	C9orf21	1.5541	0.017683
rhomboid domain containing 2	RHBDD2	1.55051	0.000100749
protocadherin alpha 3	PCDHA3	1.54821	0.0342276
chloride intracellular channel 4	CLIC4	1.54754	0.00531243
chromosome 5 open reading frame 4	C5orf4	1.54427	0.0371925
aryl hydrocarbon receptor	AHR	1.54364	0.0121129
small nucleolar RNA, C/D box 75	SNORD75	1.54107	0.0151192
HMG-box transcription factor 1	HBP1	1.54021	0.00232741
inducible T-cell co-stimulator	ICOS	1.53801	0.0257957
microfibrillar-associated protein 3-like	MFAP3L	1.53266	0.0269675
syndecan 4	SDC4	1.53183	0.00963131
chromosome X open reading frame 65	CXorf65	1.53154	0.00153007
olfactory receptor, family 4, subfamily K, member 2	OR4K2	1.52659	0.00719543
bone morphogenetic protein 6	BMP6	1.52568	0.0105191
chromosome 7 open reading frame 41	C7orf41	1.52297	0.00531183
human immunodeficiency virus type I enhancer binding protein 1	HIVEP1	1.52164	0.00500933
guanine nucleotide binding protein (G protein), alpha activating activity polypeptide O	GNAO1	1.52093	0.00171172
prostaglandin E synthase	PTGES	1.52033	0.00349698
ADP-ribosylation factor-like 5B	ARL5B	1.51791	0.0067108
spermine oxidase	SMOX	1.51377	0.0238138
insulin induced gene 1	INSIG1	1.5118	0.00134919
cortactin	CTTN	1.5112	0.0285164
regulator of G-protein signaling 6	RGS6	1.51117	0.00317588
jun D proto-oncogene	JUND	1.50858	0.00467058
TCDD-inducible poly(ADP-ribose) polymerase	TIPARP	1.50711	0.00547226
GRP1 (general receptor for phosphoinositides 1)-associated scaffold protein	GRASP	1.50569	0.00847428
ankyrin repeat domain 20 family, member A8, pseudogene	ANKRD20A8P	1.5053	0.0435981
protein regulator of cytokinesis 1	PRC1	1.50368	0.00084658
nuclear receptor subfamily 1, group D, member 2	NR1D2	1.50169	0.00263966
guanosine monophosphate reductase	GMPR	1.50141	0.0350151
cyclin-dependent kinase inhibitor 1A (p21, Cip1)	CDKN1A	1.49931	0.00766529
mitogen-activated protein kinase kinase kinase 8	MAP3K8	1.49925	0.00143797
small nucleolar RNA, C/D box 1C	SNORD1C	1.49846	0.0460129
Rap guanine nucleotide exchange factor (GEF) 2	RAPGEF2	1.49835	0.0353144
ADNP homeobox 2	ADNP2	1.49717	0.00719075
ureidopropionase, beta	UPB1	1.49631	0.00194598
follistatin-like 1	FSTL1	1.49573	0.0421654
v-yes-1 Yamaguchi sarcoma viral oncogene homolog 1	YES1	1.49389	0.00166356
prostaglandin-endoperoxide synthase 1 (prostaglandin G/H synthase and cyclooxygenase)	PTGS1	1.49194	0.0415329
general transcription factor IIIC, polypeptide 4, 90kDa	GTF3C4	1.49193	0.00287206
musculin	MSC	1.49088	0.0190335
myeloproliferative leukemia virus oncogene	MPL	1.49057	0.0290846
sema domain, transmembrane domain (TM), and cytoplasmic domain, (semaphorin) 6B	SEMA6B	1.4851	0.00109905
StAR-related lipid transfer (START) domain containing 4	STARD4	1.48325	0.0178955
actin binding LIM protein family, member 3	ABLIM3	1.48314	0.00802857
heat shock 70kDa protein 2	HSPA2	1.4826	0.00320743
general transcription factor IIB	GTF2B	1.48191	0.00148004
leucine rich repeat (in FLII) interacting protein 1	LRRFIP1	1.48079	0.0173869
nuclear factor of kappa light polypeptide gene enhancer in B-cells 1	NFKB1	1.48045	0.000485717
CWC25 spliceosome-associated protein homolog (S. cerevisiae)	CWC25	1.47909	0.00122909
asparagine-linked glycosylation 10, alpha-1,2-glucosyltransferase homolog (S. pombe)	ALG10	1.4778	0.0277285
isopentenyl-diphosphate delta isomerase 1	IDI1	1.47418	0.00389465
phosphodiesterase 4B, cAMP-specific	PDE4B	1.47258	0.00194598
similar to hypothetical gene supported by BC039313	LOC653203	1.47214	0.00509205
hypothetical LOC151009	LOC151009	1.46911	0.0342158
chemokine (C-C motif) receptor 4	CCR4	1.46858	0.00148004
olfactory receptor, family 8, subfamily G, member 1	OR8G1	1.46833	0.00952402
erythrocyte membrane protein band 4.9 (dematin)	EPB49	1.46802	0.0427177
zinc finger protein 165	ZNF165	1.46439	0.000834203
ADP-ribosylation factor-like 4A	ARL4A	1.4638	0.00163472
NECAP endocytosis associated 1	NECAP1	1.46356	0.000580938
protein phosphatase 1, regulatory (inhibitor) subunit 15B	PPP1R15B	1.46255	0.000947141
AT rich interactive domain 5A (MRF1-like)	ARID5A	1.46165	0.00219434
phospholipase C-like 1	PLCL1	1.45954	0.00126346
latent transforming growth factor beta binding protein 1	LTBP1	1.45736	0.0499347
chromosome 4 open reading frame 46	C4orf46	1.45711	0.0189313
solute carrier family 24 (sodium/potassium/calcium exchanger), member 3	SLC24A3	1.45678	0.0238741
von Willebrand factor C domain containing protein 2-like	VWC2L	1.45625	0.00491114
clusterin	CLU	1.45529	0.0481341
BCL2-associated transcription factor 1	BCLAF1	1.45374	0.000591784
adrenomedullin	ADM	1.45341	0.0308974
DCP1 decapping enzyme homolog A (S. cerevisiae)	DCP1A	1.45221	0.00174801
histone cluster 2, H2be	HIST2H2BE	1.45065	0.013874
Rho family GTPase 1	RND1	1.45007	0.00321097
chromosome 6 open reading frame 25	C6orf25	1.44944	0.0101954
Shwachman-Bodian-Diamond syndrome	SBDS	1.44695	0.00307831
thyroid hormone receptor interactor 10	TRIP10	1.44674	0.00143647
PHD finger protein 1	PHF1	1.44188	0.00317648
baculoviral IAP repeat containing 3	BIRC3	1.43836	0.0236961
elongation factor, RNA polymerase II, 2	ELL2	1.43779	0.000468821
solute carrier family 25, member 36	SLC25A36	1.43764	0.00814382
nuclear receptor interacting protein 1	NRIP1	1.43759	0.0280885
eukaryotic translation initiation factor 4H	EIF4H	1.43733	0.00290514
integrin, beta 3 (platelet glycoprotein IIIa, antigen CD61)	ITGB3	1.43702	0.0495923
major facilitator superfamily domain containing 2B	MFSD2B	1.43596	0.0233749
nicotinamide phosphoribosyltransferase	NAMPT	1.43416	0.0386356
polypyrimidine tract binding protein 2	PTBP2	1.43404	0.00480125
sterol-C4-methyl oxidase-like	SC4MOL	1.43401	0.0191831
GA binding protein transcription factor, beta subunit 1	GABPB1	1.43324	0.0117549
solute carrier family 25, member 26	SLC25A26	1.43286	0.00545949
basic helix-loop-helix family, member e40	BHLHE40	1.43273	0.00658929
G protein-coupled receptor 183	GPR183	1.43207	0.016573
calcium binding protein 5	CABP5	1.43017	0.0124057
LON peptidase N-terminal domain and ring finger 1	LONRF1	1.43013	0.0428773
synemin, intermediate filament protein	SYNM	1.42972	0.0181867
neuroguidin, EIF4E binding protein	NGDN	1.42787	0.0066958
tumor protein p53 inducible nuclear protein 2	TP53INP2	1.42589	0.00297809
cysteine-serine-rich nuclear protein 1	CSRNP1	1.42354	0.00748987
superoxide dismutase 2, mitochondrial	SOD2	1.42256	0.0123452
histone cluster 2, H2bf	HIST2H2BF	1.41969	0.0487605
transmembrane protein 40	TMEM40	1.41789	0.00856865
tumor necrosis factor, alpha-induced protein 3	TNFAIP3	1.41741	0.00170105
coiled-coil domain containing 19	CCDC19	1.41709	0.0016602
tumor protein p53 binding protein, 2	TP53BP2	1.41695	0.000868887
myosin, light chain 9, regulatory	MYL9	1.41302	0.0115434
SMAD specific E3 ubiquitin protein ligase 1	SMURF1	1.41286	0.0011478
pim-2 oncogene	PIM2	1.41086	0.0295873
non-protein coding RNA 219	NCRNA00219	1.40874	0.000652804
v-rel reticuloendotheliosis viral oncogene homolog (avian)	REL	1.4084	0.00674319
cerebellar degeneration-related protein 2, 62kDa	CDR2	1.40834	0.001892
family with sequence similarity 115, member C	FAM115C	1.40527	0.00241595
DnaJ (Hsp40) homolog, subfamily B, member 6	DNAJB6	1.40369	0.00330022
neogenin 1	NEO1	1.40312	0.00478088
trace amine associated receptor 3 (gene/pseudogene)	TAAR3	1.40275	0.017847
squalene epoxidase	SQLE	1.39845	0.021469
odd-skipped related 2 (Drosophila)	OSR2	1.39821	0.000738817
progesterone receptor membrane component 1	PGRMC1	1.39722	0.0286475
interferon regulatory factor 1	IRF1	1.39712	0.00158742
ring finger protein 11	RNF11	1.39684	0.0213035
tubulin, beta 1	TUBB1	1.39682	0.0323938
myosin light chain kinase	MYLK	1.39656	0.00893774
small nucleolar RNA, C/D box 43	SNORD43	1.39642	0.0129075
tumor necrosis factor, alpha-induced protein 2	TNFAIP2	1.39601	0.0253914
coiled-coil domain containing 94	CCDC94	1.39598	0.00671555
small nucleolar RNA, H/ACA box 61	SNORA61	1.39577	0.0280681
chromosome 1 open reading frame 198	C1orf198	1.39552	0.00657226
integrin, beta 5	ITGB5	1.39539	0.032643
coiled-coil domain containing 59	CCDC59	1.39496	0.0476031
SMT3 suppressor of mif two 3 homolog 4 (S. cerevisiae)	SUMO4	1.39493	0.00775006
elongation factor, RNA polymerase II, 2	ELL2	1.39489	0.00474408
chromosome 2 open reading frame 88	C2orf88	1.39379	0.0105544
phosphatidylinositol 4-kinase type 2 alpha	PI4K2A	1.39375	0.000635333
ATPase, Ca++ transporting, plasma membrane 1	ATP2B1	1.39344	0.0100005
cyclin T1	CCNT1	1.3926	0.00142406
SKI-like oncogene	SKIL	1.39234	0.0305119
endothelial PAS domain protein 1	EPAS1	1.39169	0.00118118
phosphoribosyl transferase domain containing 1	PRTFDC1	1.3906	0.00952881
YOD1 OTU deubiquinating enzyme 1 homolog (S. cerevisiae)	YOD1	1.38791	0.0029442
nuclear factor of kappa light polypeptide gene enhancer in B-cells inhibitor, epsilon	NFKBIE	1.38736	0.0163931
chromosome 12 open reading frame 39	C12orf39	1.38596	0.0431489
golgin A6 family, member A	GOLGA6A	1.38507	0.0474934
zinc finger protein 644	ZNF644	1.38411	0.0276794
metaxin 3	MTX3	1.38302	0.00705866
tubulin tyrosine ligase-like family, member 7	TTLL7	1.38289	0.0162621
nuclear receptor interacting protein 3	NRIP3	1.38117	0.0129075
dehydrogenase/reductase (SDR family) member 3	DHRS3	1.38112	0.00368344
ets variant 3	ETV3	1.37959	0.00491305
heterogeneous nuclear ribonucleoprotein C (C1/C2)	HNRNPC	1.37945	0.0122743
jumonji domain containing 6	JMJD6	1.37933	0.0105191
suppressor of var1, 3-like 1 (S. cerevisiae)	SUPV3L1	1.37752	0.0116584
chromosome 14 open reading frame 45	C14orf45	1.37529	0.0123546
chromosome 4 open reading frame 46	C4orf46	1.37468	0.00332316
protein kinase, cGMP-dependent, type I	PRKG1	1.37424	0.00714678
chromosome 5 open reading frame 44	C5orf44	1.37405	0.00580248
cryptochrome 2 (photolyase-like)	CRY2	1.37401	0.000868704
proprotein convertase subtilisin/kexin type 6	PCSK6	1.37305	0.018405
forkhead box O3B pseudogene	FOXO3B	1.37273	0.00916397
spermatogenesis associated 2	SPATA2	1.37212	0.00588119
KRR1, small subunit (SSU) processome component, homolog (yeast)	KRR1	1.37198	0.0052869
zinc finger protein 317	ZNF317	1.37052	0.00270823
SPRY domain containing 5	SPRYD5	1.36987	0.0192813
EH-domain containing 1	EHD1	1.36829	0.00598914
snail homolog 1 (Drosophila)	SNAI1	1.36803	0.0330785
olfactory receptor, family 2, subfamily T, member 33	OR2T33	1.36746	0.041199
SYS1 Golgi-localized integral membrane protein homolog (S. cerevisiae)	SYS1	1.36728	0.00325043
olfactory receptor, family 6, subfamily C, member 76	OR6C76	1.36686	0.0395237
microRNA 23a	MIR23A	1.36676	0.00838763
forkhead box D4-like 6	FOXD4L6	1.36439	0.0318647
transmembrane protein with EGF-like and two follistatin-like domains 1	TMEFF1	1.36433	0.0226395
ELL associated factor 1	EAF1	1.36413	0.0132526
zinc finger protein 385D	ZNF385D	1.36355	0.00983064
ribosomal RNA processing 12 homolog (S. cerevisiae)	RRP12	1.36352	0.0299531
DEAD (Asp-Glu-Ala-Asp) box polypeptide 20	DDX20	1.36315	0.0181998
villin 1	VIL1	1.36308	0.013576
myosin XVB pseudogene	MYO15B	1.36247	0.0376084
phosphoinositide-3-kinase interacting protein 1	PIK3IP1	1.3621	0.000348619
CD80 molecule	CD80	1.36148	0.021999
RNA (guanine-7-) methyltransferase	RNMT	1.36014	0.0408242
RNA terminal phosphate cyclase-like 1	RCL1	1.35959	0.00597545
Rho-related BTB domain containing 1	RHOBTB1	1.35928	0.0189522
antizyme inhibitor 1	AZIN1	1.3582	0.00402207
TWIST neighbor	TWISTNB	1.35635	0.0105528
guanine nucleotide binding protein (G protein), alpha z polypeptide	GNAZ	1.3563	0.0399793
hydroxysteroid (17-beta) dehydrogenase 3	HSD17B3	1.35552	0.0272032
ATG14 autophagy related 14 homolog (S. cerevisiae)	ATG14	1.35542	0.0107139
TNF receptor-associated factor 4	TRAF4	1.3545	0.00802857
regulation of nuclear pre-mRNA domain containing 1B	RPRD1B	1.35442	0.00325043
monoglyceride lipase	MGLL	1.3537	0.0093702
transmembrane protein 191A	TMEM191A	1.35336	0.0407838
dynactin 6	DCTN6	1.35307	0.0205183
armadillo repeat containing 3	ARMC3	1.35271	0.0492257
four and a half LIM domains 1	FHL1	1.352	0.0210303
B-cell CLL/lymphoma 7B	BCL7B	1.35198	0.00563961
RELT-like 1	RELL1	1.35141	0.0037111
zinc finger protein 639	ZNF639	1.35127	0.034947
v-maf musculoaponeurotic fibrosarcoma oncogene homolog F (avian)	MAFF	1.3511	0.00657226
myeloid-associated differentiation marker-like	MYADML	1.35057	0.0237183
COP9 constitutive photomorphogenic homolog subunit 2 (Arabidopsis)	COPS2	1.34969	0.0228581
ring finger protein 103	RNF103	1.34868	0.0133545
INO80 complex subunit D	INO80D	1.34646	0.00324762
MAP3K12 binding inhibitory protein 1	MBIP	1.346	0.00754037
hypoxia inducible factor 1, alpha subunit (basic helix-loop-helix transcription factor)	HIF1A	1.34518	0.0191234
zinc finger protein 711	ZNF711	1.34463	0.0137132
transmembrane protein 167B	TMEM167B	1.34454	0.00365096
nuclear import 7 homolog (S. cerevisiae)	NIP7	1.34403	0.0123383
ubiquitin specific peptidase 12	USP12	1.34248	0.0300197
yippee-like 5 (Drosophila)	YPEL5	1.34162	0.000312506
TNFAIP3 interacting protein 1	TNIP1	1.34148	0.0174771
insulin-like growth factor 2 mRNA binding protein 3	IGF2BP3	1.34121	0.0346104
platelet endothelial aggregation receptor 1	PEAR1	1.34084	0.0102404
ornithine decarboxylase 1	ODC1	1.34073	0.0357695
lysine (K)-specific demethylase 6B	KDM6B	1.3401	0.0301692
family with sequence similarity 105, member B	FAM105B	1.34004	0.00792079
nudix (nucleoside diphosphate linked moiety X)-type motif 9 pseudogene 1	NUDT9P1	1.33939	0.0191127
DEAD (Asp-Glu-Ala-Asp) box polypeptide 24	DDX24	1.33895	0.00344585
toll-like receptor adaptor molecule 1	TICAM1	1.3383	0.0133141
RIO kinase 3 (yeast)	RIOK3	1.33803	0.0266394
heat shock 70kDa protein 5 (glucose-regulated protein, 78kDa)	HSPA5	1.33748	0.00657226
polymerase (RNA) III (DNA directed) polypeptide G (32kD)	POLR3G	1.33705	0.0110969
family with sequence similarity 27, member A	FAM27A	1.33683	0.0181818
laminin, beta 3	LAMB3	1.33618	0.0210369
growth factor independent 1B transcription repressor	GFI1B	1.33593	0.00523523
pre-B-cell leukemia homeobox 4	PBX4	1.33527	0.00880327
tetratricopeptide repeat domain 7B	TTC7B	1.33493	0.0453216
chromosome 9 open reading frame 156	C9orf156	1.33492	0.00868947
leucine-rich repeats and transmembrane domains 2	LRTM2	1.33458	0.0143282
ubiquitin-conjugating enzyme E2D 3 (UBC4/5 homolog, yeast)	UBE2D3	1.33422	0.00846364
target of EGR1, member 1 (nuclear)	TOE1	1.33395	0.00510105
GrpE-like 1, mitochondrial (E. coli)	GRPEL1	1.3328	0.018868
tetraspanin 6	TSPAN6	1.33228	0.0196084
ring finger protein 19A	RNF19A	1.33159	0.0150044
caldesmon 1	CALD1	1.33145	0.0112332
Tctex1 domain containing 4	TCTEX1D4	1.33134	0.00580248
dpy-19-like 2 pseudogene 2 (C. elegans)	DPY19L2P2	1.33113	0.0422068
zinc finger, AN1-type domain 2A	ZFAND2A	1.33073	0.0174561
olfactory receptor, family 9, subfamily Q, member 2	OR9Q2	1.33054	0.00385626
colony stimulating factor 1 (macrophage)	CSF1	1.33048	0.0266394
WAS protein homolog associated with actin, golgi membranes and microtubules-like 1 (pseudogene)	WHAMML1	1.32998	0.00419311
coiled-coil domain containing 64	CCDC64	1.32989	0.0137243
eukaryotic translation initiation factor 1A domain containing	EIF1AD	1.32975	0.0153032
minichromosome maintenance complex component 9	MCM9	1.32935	0.0341089
eukaryotic translation termination factor 1	ETF1	1.32843	0.00808864
MAX interactor 1	MXI1	1.32828	0.0186237
transmembrane protein 67	TMEM67	1.32445	0.0405138
dual specificity phosphatase 4	DUSP4	1.32368	0.0221307
WAS protein family, member 3	WASF3	1.32319	0.00235091
phosphodiesterase 4D, cAMP-specific	PDE4D	1.32269	0.0191127
small nucleolar RNA host gene 12 (non-protein coding)	SNHG12	1.32246	0.00536299
retinitis pigmentosa GTPase regulator	RPGR	1.32227	0.00287656
solute carrier family 6 (neurotransmitter transporter, serotonin), member 4	SLC6A4	1.32205	0.0100005
major facilitator superfamily domain containing 2B	MFSD2B	1.32018	0.0461918
olfactory receptor, family 13, subfamily F, member 1	OR13F1	1.31907	0.0398275
phosphate cytidylyltransferase 1, choline, beta	PCYT1B	1.31879	0.0161058
small glutamine-rich tetratricopeptide repeat (TPR)-containing, beta	SGTB	1.3185	0.0137288
serine incorporator 1	SERINC1	1.31834	0.0046594
A kinase (PRKA) anchor protein 8	AKAP8	1.31818	0.00951019
mitochondrial E3 ubiquitin protein ligase 1	MUL1	1.31683	0.0101313
matrilin 1, cartilage matrix protein	MATN1	1.31676	0.00680192
ankyrin repeat domain 49	ANKRD49	1.31628	0.0324134
family with sequence similarity 103, member A1	FAM103A1	1.31513	0.00348185
olfactory receptor, family 5, subfamily I, member 1	OR5I1	1.31503	0.0114377
zinc finger protein 362	ZNF362	1.3146	0.0346104
olfactory receptor, family 8, subfamily K, member 5	OR8K5	1.31432	0.01895
HAUS augmin-like complex, subunit 3	HAUS3	1.31426	0.037027
B melanoma antigen family, member 2	BAGE2	1.31394	0.0310496
RAR-related orphan receptor A	RORA	1.31323	0.00273649
catenin (cadherin-associated protein), alpha-like 1	CTNNAL1	1.31317	0.0131951
chromosome 6 open reading frame 138	C6orf138	1.31272	0.0335472
chromosome 9 open reading frame 30	C9orf30	1.3122	0.029356
zinc finger protein 614	ZNF614	1.31215	0.0457646
coilin	COIL	1.31155	0.00157383
Wilms tumor 1 associated protein	WTAP	1.30911	0.0278425
Kruppel-like factor 6	KLF6	1.30787	0.0102327
UL16 binding protein 2	ULBP2	1.30745	0.0167326
phosphodiesterase 4D interacting protein	PDE4DIP	1.3073	0.0104272
fem-1 homolog c (C. elegans)	FEM1C	1.30705	0.00863885
ERBB receptor feedback inhibitor 1	ERRFI1	1.30704	0.044534
hypothetical LOC79857	FLJ13224	1.30662	0.00695992
nuclear pore complex interacting protein	NPIP	1.30564	0.0230334
small nucleolar RNA, H/ACA box 51	SNORA51	1.30491	0.00970142
adenosine A2a receptor	ADORA2A	1.30469	0.0137291
DC-STAMP domain containing 2	DCST2	1.30432	0.00875239
chromosome 7 open reading frame 66	C7orf66	1.30415	0.00163366
TBC1 domain family, member 15	TBC1D15	1.30386	0.01378
chromosome 7 open reading frame 64	C7orf64	1.30372	0.038327
pleckstrin and Sec7 domain containing 3	PSD3	1.30323	0.0062146
olfactory receptor, family 7, subfamily E, member 24	OR7E24	1.30311	0.0393056
leucine rich repeat containing 8 family, member B	LRRC8B	1.30279	0.0221322
HMG box domain containing 4	HMGXB4	1.30251	0.0104369
neuroblastoma RAS viral (v-ras) oncogene homolog	NRAS	1.30245	0.00378706
hypothetical FLJ46363	FLJ46363	1.30103	0.0169217
RNA binding motif protein 38	RBM38	1.30028	0.0314309
chromosome 12 open reading frame 32	C12orf32	1.30014	0.025876
TSPY-like 4	TSPYL4	1.30013	0.00248305
adaptor-related protein complex 3, mu 2 subunit	AP3M2	1.2998	0.0449915
zinc finger CCCH-type containing 12C	ZC3H12C	1.29971	0.0473606
IKAROS family zinc finger 5 (Pegasus)	IKZF5	1.29867	0.0186428
RAP2C, member of RAS oncogene family	RAP2C	1.29779	0.00407542
wingless-type MMTV integration site family, member 10B	WNT10B	1.29645	0.0394103
cytokine receptor-like factor 2	CRLF2	1.29614	0.0382694
olfactory receptor, family 2, subfamily J, member 3	OR2J3	1.29587	0.0230021
sparc/osteonectin, cwcv and kazal-like domains proteoglycan (testican) 2	SPOCK2	1.29516	0.0131139
SYF2 homolog, RNA splicing factor (S. cerevisiae)	SYF2	1.29466	0.0149163
eukaryotic translation initiation factor 2-alpha kinase 3	EIF2AK3	1.29441	0.0446449
pre-B-cell leukemia homeobox 1	PBX1	1.29428	0.012982
chromosome 4 open reading frame 50	C4orf50	1.29413	0.0228551
transmembrane protein 183A	TMEM183A	1.2934	0.0268642
chromosome 9 open reading frame 89	C9orf89	1.29338	0.0228774
PTC7 protein phosphatase homolog (S. cerevisiae)	PPTC7	1.29279	0.0294866
histone cluster 1, H1a	HIST1H1A	1.29248	0.0306575
protein associated with topoisomerase II homolog 1 (yeast)	PATL1	1.29237	0.0140859
family with sequence similarity 160, member B1	FAM160B1	1.29214	0.0185044
tigger transposable element derived 2 pseudogene	FLJ37201	1.29156	0.00731704
Rab geranylgeranyltransferase, beta subunit	RABGGTB	1.29003	0.0188197
transformer 2 alpha homolog (Drosophila)	TRA2A	1.28966	0.0290977
immediate early response 5	IER5	1.28863	0.0106858
nucleosome assembly protein 1-like 5	NAP1L5	1.28757	0.0136162
ring finger protein, LIM domain interacting	RLIM	1.28745	0.0358675
DnaJ (Hsp40) homolog, subfamily C, member 27	DNAJC27	1.28739	0.0338649
sorting nexin 9	SNX9	1.28688	0.024077
leucine rich repeat containing 32	LRRC32	1.28625	0.0157684
fibroblast growth factor receptor substrate 2	FRS2	1.28615	0.0406126
olfactory receptor, family 5, subfamily P, member 2	OR5P2	1.28497	0.00942065
cell division cycle 37 homolog (S. cerevisiae)-like 1	CDC37L1	1.2846	0.0138594
kinesin family member 18A	KIF18A	1.28392	0.0283737
breast carcinoma amplified sequence 2	BCAS2	1.28368	0.00270823
glycoprotein IX (platelet)	GP9	1.28366	0.0230021
mediator complex subunit 12-like	MED12L	1.28351	0.0075204
DEAD (Asp-Glu-Ala-Asp) box polypeptide 3, Y-linked	DDX3Y	1.28297	0.0145431
centromere protein M	CENPM	1.28268	0.00445497
olfactory receptor, family 51, subfamily V, member 1	OR51V1	1.28231	0.025143
suppressor of cytokine signaling 1	SOCS1	1.28153	0.0357368
sphingosine kinase 1	SPHK1	1.28149	0.0372941
small nucleolar RNA, H/ACA box 10	SNORA10	1.2805	0.0262579
mediator complex subunit 9	MED9	1.27951	0.0167526
E74-like factor 2 (ets domain transcription factor)	ELF2	1.27874	0.0386356
chromatin modifying protein 4B	CHMP4B	1.27851	0.00290514
WW domain binding protein 11	WBP11	1.27807	0.00483981
sprouty homolog 4 (Drosophila)	SPRY4	1.2775	0.0439869
phosphoinositide-3-kinase, regulatory subunit 1 (alpha)	PIK3R1	1.27728	0.0180597
par-3 partitioning defective 3 homolog (C. elegans)	PARD3	1.27678	0.0121342
guanine nucleotide binding protein (G protein), beta 5	GNB5	1.27622	0.0106858
Sec61 alpha 2 subunit (S. cerevisiae)	SEC61A2	1.27617	0.0188052
meiosis-specific nuclear structural 1	MNS1	1.27522	0.0396395
tetratricopeptide repeat domain 30A	TTC30A	1.27499	0.0191233
G protein-coupled receptor 35	GPR35	1.27462	0.0483429
TRAF3 interacting protein 2	TRAF3IP2	1.27369	0.0176652
LanC lantibiotic synthetase component C-like 3 (bacterial)	LANCL3	1.27355	0.0150913
protein phosphatase 1, regulatory (inhibitor) subunit 15A	PPP1R15A	1.27351	0.0131951
hypothetical LOC401232	DKFZP686I15217	1.27291	0.00198305
family with sequence similarity 133, member B	FAM133B	1.27254	0.0206625
TSPY-like 1	TSPYL1	1.27228	0.00193428
zinc finger E-box binding homeobox 1	ZEB1	1.2719	0.0310841
flap structure-specific endonuclease 1	FEN1	1.27177	0.00287807
cholinergic receptor, muscarinic 4	CHRM4	1.27174	0.044534
microRNA 320a	MIR320A	1.27127	0.0362421
defensin, beta 130	DEFB130	1.27121	0.0232578
growth arrest-specific 2 like 3	GAS2L3	1.26963	0.0435981
zinc finger protein 687	ZNF687	1.26937	0.0298596
tripartite motif containing 23	TRIM23	1.26922	0.0180058
transmembrane protein 91	TMEM91	1.26922	0.0294673
hypothetical protein LOC100130156	LOC100130156	1.26858	0.0275518
BUD31 homolog (S. cerevisiae)	BUD31	1.26831	0.0254884
par-3 partitioning defective 3 homolog B (C. elegans)	PARD3B	1.26811	0.0153673
RWD domain containing 1	RWDD1	1.26765	0.0154885
serpin peptidase inhibitor, clade E (nexin, plasminogen activator inhibitor type 1), member 1	SERPINE1	1.26675	0.0495923
immunoglobulin-like domain containing receptor 2	ILDR2	1.26622	0.010379
RAB, member RAS oncogene family-like 5	RABL5	1.26607	0.0254161
growth arrest and DNA-damage-inducible, alpha	GADD45A	1.26591	0.0307151
G kinase anchoring protein 1	GKAP1	1.26546	0.0219821
translocase of outer mitochondrial membrane 20 homolog (yeast)	TOMM20	1.26535	0.0140518
IQ motif containing J	IQCJ	1.26481	0.00833222
polymerase (RNA) III (DNA directed) polypeptide E (80kD)	POLR3E	1.26474	0.00876364
RAB6B, member RAS oncogene family	RAB6B	1.26464	0.00374139
microRNA 99a	MIR99A	1.26462	0.00146018
FK506 binding protein 1B, 12.6 kDa	FKBP1B	1.26458	0.0322589
ribonucleoprotein, PTB-binding 2	RAVER2	1.26353	0.023032
NOP58 ribonucleoprotein homolog (yeast)	NOP58	1.26258	0.0306126
DEAD (Asp-Glu-Ala-Asp) box polypeptide 21	DDX21	1.26248	0.0357677
chaperonin containing TCP1, subunit 6B (zeta 2)	CCT6B	1.26223	0.00794561
dual-specificity tyrosine-(Y)-phosphorylation regulated kinase 3	DYRK3	1.26209	0.0306575
zinc finger protein 552	ZNF552	1.26176	0.0265095
transgelin 2	TAGLN2	1.26107	0.0112379
enhancer of zeste homolog 2 (Drosophila)	EZH2	1.26096	0.0328019
homeodomain interacting protein kinase 1	HIPK1	1.26065	0.0193174
period homolog 2 (Drosophila)	PER2	1.26037	0.0323577
heterogeneous nuclear ribonucleoprotein C (C1/C2)	HNRNPC	1.2603	0.00241526
defensin, beta 134	DEFB134	1.26002	0.0317853
AT rich interactive domain 4B (RBP1-like)	ARID4B	1.25962	0.0447143
UDP-Gal:betaGlcNAc beta 1,4- galactosyltransferase, polypeptide 1	B4GALT1	1.25951	0.0371049
headcase homolog (Drosophila)	HECA	1.25918	0.0187938
cytochrome c oxidase subunit IV isoform 1	COX4I1	1.25877	0.0176652
partner of NOB1 homolog (S. cerevisiae)	PNO1	1.25875	0.018201
ubiquitin associated protein 1	UBAP1	1.25859	0.0480638
RANBP2-like and GRIP domain containing 5	RGPD5	1.25838	0.0128142
inositol 1,4,5-triphosphate receptor interacting protein	ITPRIP	1.25828	0.0491694
male germ cell-associated kinase	MAK	1.25813	0.0479993
TSC22 domain family, member 2	TSC22D2	1.25746	0.00661967
protein phosphatase 1, regulatory (inhibitor) subunit 16B	PPP1R16B	1.25651	0.00983064
ezrin	EZR	1.25628	0.0332082
small Cajal body-specific RNA 8	SCARNA8	1.25604	0.0333467
hypothetical FLJ13197	FLJ13197	1.25571	0.0105528
mitogen-activated protein kinase 1 interacting protein 1-like	MAPK1IP1L	1.25454	0.0151958
spectrin, alpha, erythrocytic 1 (elliptocytosis 2)	SPTA1	1.25445	0.00905735
zinc finger CCCH-type containing 15	ZC3H15	1.25373	0.0221591
small nucleolar RNA, C/D box 96A	SNORD96A	1.25365	0.0384304
sorting nexin 18	SNX18	1.25241	0.0284863
PEST proteolytic signal containing nuclear protein	PCNP	1.2522	0.00399791
solute carrier family 30 (zinc transporter), member 8	SLC30A8	1.25168	0.00818104
ribonuclease H1	RNASEH1	1.25154	0.0277285
Ras suppressor protein 1	RSU1	1.2506	0.0180726
microRNA 153-2	MIR153-2	1.25001	0.0469531
zinc finger, RAN-binding domain containing 1	ZRANB1	1.24996	0.0306435
SNF related kinase	SNRK	1.24977	0.00496545
olfactory receptor, family 52, subfamily A, member 5	OR52A5	1.24957	0.0210964
major facilitator superfamily domain containing 6	MFSD6	1.24952	0.0485139
lipoma HMGIC fusion partner	LHFP	1.24918	0.0192238
ubiquitin specific peptidase 36	USP36	1.24899	0.0317037
golgin B1	GOLGB1	1.2479	0.0271812
heterogeneous nuclear ribonucleoprotein A1	HNRNPA1	1.24758	0.021084
SNW domain containing 1	SNW1	1.24737	0.0320954
olfactory receptor, family 10, subfamily Z, member 1	OR10Z1	1.24656	0.0437651
transforming growth factor beta 1 induced transcript 1	TGFB1I1	1.24647	0.012019
chromosome 19 open reading frame 48	C19orf48	1.24623	0.0117533
exosome component 9	EXOSC9	1.24568	0.00750911
OCIA domain containing 2	OCIAD2	1.2455	0.0395585
RNA binding motif protein 39	RBM39	1.24528	0.00258077
small nucleolar RNA, C/D box 113-4	SNORD113-4	1.24527	0.0254359
ubiquitin specific peptidase 42	USP42	1.24463	0.00997949
cold inducible RNA binding protein	CIRBP	1.24449	0.00642294
endothelin receptor type A	EDNRA	1.24426	0.0164608
leucine rich repeat containing 23	LRRC23	1.2441	0.0467143
small nucleolar RNA, C/D box 13 pseudogene 1	SNORD13P1	1.24365	0.0461988
chromodomain helicase DNA binding protein 2	CHD2	1.24293	0.0121406
adenosine A2b receptor	ADORA2B	1.24231	0.0204595
NDC80 homolog, kinetochore complex component (S. cerevisiae)	NDC80	1.24141	0.00534975
arginine-fifty homeobox	ARGFX	1.24131	0.0432137
sodium channel, voltage-gated, type I, alpha subunit	SCN1A	1.24064	0.0106126
meningioma (disrupted in balanced translocation) 1	MN1	1.24059	0.0306627
BSD domain containing 1	BSDC1	1.24035	0.0340536
collagen, type XIV, alpha 1	COL14A1	1.2388	0.015776
chemokine (C-X-C motif) receptor 4	CXCR4	1.23855	0.041199
chromatin modifying protein 1B	CHMP1B	1.23787	0.0440668
cytochrome b5 reductase 2	CYB5R2	1.23785	0.0321686
Smad nuclear interacting protein 1	SNIP1	1.23731	0.00446333
protein phosphatase 1, regulatory (inhibitor) subunit 2	PPP1R2	1.23727	0.0202402
G patch domain containing 3	GPATCH3	1.23721	0.0200614
suppression of tumorigenicity 7	ST7	1.23717	0.0322589
CXXC finger protein 4	CXXC4	1.23633	0.0108262
ets homologous factor	EHF	1.23621	0.01772
pinin, desmosome associated protein	PNN	1.23554	0.037444
Wilms tumor 1 associated protein	WTAP	1.23542	0.00512709
OK/SW-CL.58	OK/SW-CL.58	1.23433	0.0376634
ectonucleotide pyrophosphatase/phosphodiesterase 3	ENPP3	1.23419	0.0372822
diacylglycerol kinase, iota	DGKI	1.23391	0.00402234
histatin 3	HTN3	1.23364	0.0189265
translocase of inner mitochondrial membrane 23 homolog (yeast)	TIMM23	1.23277	0.0241951
DnaJ (Hsp40) homolog, subfamily A, member 1 pseudogene 5	DNAJA1P5	1.23267	0.0299531
solute carrier family 9 (sodium/hydrogen exchanger), member 8	SLC9A8	1.23248	0.0461435
unc-51-like kinase 4 (C. elegans)	ULK4	1.23131	0.0324868
hypothetical LOC442075	LOC442075	1.2313	0.0238741
chromosome 16 open reading frame 54	C16orf54	1.23118	0.0200623
zinc finger protein 532	ZNF532	1.231	0.0294308
solute carrier family 25, member 33	SLC25A33	1.22974	0.0439786
sushi-repeat containing protein, X-linked	SRPX	1.22954	0.0296392
zinc finger protein, multitype 2	ZFPM2	1.22953	0.0159287
contactin 3 (plasmacytoma associated)	CNTN3	1.22948	0.0353523
nuclear factor of kappa light polypeptide gene enhancer in B-cells inhibitor, beta	NFKBIB	1.2282	0.0121452
hypothetical protein DKFZP434I0714	DKFZP434I0714	1.22777	0.030633
MYST histone acetyltransferase 2	MYST2	1.22772	0.0271138
pleckstrin homology-like domain, family A, member 2	PHLDA2	1.22767	0.0194812
DnaJ (Hsp40) homolog, subfamily B, member 2	DNAJB2	1.22684	0.0239268
N-acetyltransferase 14 (GCN5-related, putative)	NAT14	1.22661	0.00395544
NTF2-like export factor 1	NXT1	1.2265	0.0468176
regulatory factor X, 2 (influences HLA class II expression)	RFX2	1.22649	0.0461918
otoraplin	OTOR	1.22623	0.0136434
DIX domain containing 1	DIXDC1	1.22619	0.0377227
fibrillin 1	FBN1	1.2256	0.0335519
zinc finger protein 570	ZNF570	1.22494	0.0309994
H3 histone, family 3B (H3.3B)	H3F3B	1.22491	0.0295688
prospero homeobox 1	PROX1	1.22447	0.0131404
DEAD (Asp-Glu-Ala-Asp) box polypeptide 47	DDX47	1.22432	0.0176398
glutamate receptor, ionotropic, N-methyl D-aspartate-like 1A	GRINL1A	1.22393	0.04888
SAP30 binding protein	SAP30BP	1.22352	0.00891214
Rho GTPase activating protein 20	ARHGAP20	1.22326	0.0122883
small nucleolar RNA, H/ACA box 57	SNORA57	1.22311	0.0467143
synaptotagmin IV	SYT4	1.22309	0.0330082
homer homolog 1 (Drosophila)	HOMER1	1.22286	0.0306435
protein phosphatase 2, catalytic subunit, alpha isozyme	PPP2CA	1.22247	0.00531243
thymosin beta 4, Y-linked	TMSB4Y	1.22214	0.0350151
solute carrier family 5 (sodium-dependent vitamin transporter), member 6	SLC5A6	1.22176	0.0246544
castor zinc finger 1	CASZ1	1.22105	0.00819753
Rho guanine nucleotide exchange factor (GEF) 5	ARHGEF5	1.22042	0.0413942
potassium inwardly-rectifying channel, subfamily J, member 14	KCNJ14	1.21975	0.0317291
chromosome 6 open reading frame 141	C6orf141	1.21975	0.0151958
ribosomal L24 domain containing 1	RSL24D1	1.21963	0.0195715
keratin associated protein 20-4	KRTAP20-4	1.21915	0.0386356
HLA complex group 27	HCG27	1.21879	0.0493755
kelch repeat and BTB (POZ) domain containing 4	KBTBD4	1.21812	0.0124057
nuclear factor of kappa light polypeptide gene enhancer in B-cells inhibitor, zeta	NFKBIZ	1.21805	0.0147072
pre-B-cell leukemia homeobox interacting protein 1	PBXIP1	1.21742	0.0219865
interleukin 17A	IL17A	1.21736	0.0487012
homeobox D8	HOXD8	1.21713	0.0338264
solute carrier family 35, member D3	SLC35D3	1.21712	0.0274242
cytoskeleton associated protein 2-like	CKAP2L	1.21658	0.0224291
ribosomal protein L36a	RPL36A	1.21593	0.0176652
mucin-like 1	MUCL1	1.2153	0.0498266
LanC lantibiotic synthetase component C-like 2 (bacterial)	LANCL2	1.21526	0.0444286
potassium channel, subfamily T, member 2	KCNT2	1.21519	0.0306575
BCL2/adenovirus E1B 19kDa interacting protein 1	BNIP1	1.21517	0.037674
kelch-like 26 (Drosophila)	KLHL26	1.21444	0.0355028
olfactory receptor, family 13, subfamily J, member 1	OR13J1	1.21441	0.0123335
eyes absent homolog 4 (Drosophila)	EYA4	1.21426	0.0433728
cAMP responsive element modulator	CREM	1.21422	0.0386356
Rh blood group, CcEe antigens	RHCE	1.21416	0.0193921
fatty acid binding protein 4, adipocyte	FABP4	1.21414	0.0341316
tumor necrosis factor receptor superfamily, member 25	TNFRSF25	1.21403	0.0428564
solute carrier family 44, member 5	SLC44A5	1.21394	0.0309994
sodium channel, voltage-gated, type II, alpha subunit	SCN2A	1.21394	0.0452104
mitochondrial ribosomal protein L10	MRPL10	1.21343	0.0265649
coagulation factor II (thrombin) receptor-like 3	F2RL3	1.21321	0.0380343
laminin, alpha 4	LAMA4	1.21309	0.0137887
rhophilin, Rho GTPase binding protein 2	RHPN2	1.21271	0.0176652
PRP3 pre-mRNA processing factor 3 homolog (S. cerevisiae)	PRPF3	1.21221	0.0180726
interferon, alpha 17	IFNA17	1.21215	0.0467143
keratin associated protein 20-1	KRTAP20-1	1.21184	0.0371049
glutamate decarboxylase 2 (pancreatic islets and brain, 65kDa)	GAD2	1.21156	0.0168402
myocyte enhancer factor 2D	MEF2D	1.21101	0.0414495
ephrin-A1	EFNA1	1.21059	0.00801283
transformer 2 alpha homolog (Drosophila)	TRA2A	1.21018	0.0352057
non-protein coding RNA 275	NCRNA00275	1.21004	0.0419988
carbonic anhydrase XI	CA11	1.2094	0.0305119
bone morphogenetic protein 3	BMP3	1.20921	0.0235004
protocadherin-related 15	PCDH15	1.2088	0.0432426
microRNA 185	MIR185	1.20814	0.0450604
GPRIN family member 3	GPRIN3	1.20804	0.0209763
mitogen-activated protein kinase-activated protein kinase 2	MAPKAPK2	1.20786	0.0302498
trace amine associated receptor 9 (gene/pseudogene)	TAAR9	1.20736	0.0283454
SIX homeobox 3	SIX3	1.20671	0.0321078
WD repeat domain 64	WDR64	1.20557	0.0279087
ataxin 7	ATXN7	1.20556	0.0452104
protein tyrosine phosphatase, non-receptor type 1	PTPN1	1.20532	0.0322589
breakpoint cluster region	BCR	1.20397	0.0201079
zinc finger protein 408	ZNF408	1.20378	0.0372832
fizzy/cell division cycle 20 related 1 (Drosophila)	FZR1	1.20311	0.028428
chromodomain protein, Y-like 2	CDYL2	1.20294	0.0262792
ribonuclease, RNase A family, 13 (non-active)	RNASE13	1.20261	0.0468176
ecdysoneless homolog (Drosophila)	ECD	1.20252	0.0326926
small nucleolar RNA, H/ACA box 65	SNORA65	1.20185	0.0410334
optineurin	OPTN	1.20164	0.022761
SLIT and NTRK-like family, member 3	SLITRK3	1.20041	0.0333007
dynein, cytoplasmic 1, intermediate chain 1	DYNC1I1	1.20033	0.0188466
WD repeat domain 86	WDR86	1.20026	0.027551
POM121 and ZP3 fusion	POMZP3	1.20017	0.042407
hypothetical LOC113230	LOC113230	1.20013	0.0103883
leukocyte cell-derived chemotaxin 2	LECT2	1.19984	0.043853
tuftelin 1	TUFT1	1.19984	0.0350176
cylindromatosis (turban tumor syndrome)	CYLD	1.1996	0.0396395
myoneurin	MYNN	1.19933	0.0346249
trace amine associated receptor 5	TAAR5	1.19927	0.0219821
zona pellucida glycoprotein 4	ZP4	1.19893	0.0252986
tumor necrosis factor (ligand) superfamily, member 9	TNFSF9	1.19821	0.0178955
thyroid hormone receptor, beta (erythroblastic leukemia viral (v-erb-a) oncogene homolog 2, avian)	THRB	1.19702	0.0221082
basic leucine zipper transcription factor, ATF-like 3	BATF3	1.19685	0.0435249
protease, serine, 16 (thymus)	PRSS16	1.19678	0.0278175
pleckstrin homology-like domain, family B, member 2	PHLDB2	1.19601	0.0186428
sodium channel, voltage-gated, type VII, alpha	SCN7A	1.19544	0.0376084
guanine nucleotide binding protein (G protein), alpha inhibiting activity polypeptide 1	GNAI1	1.19474	0.0317567
casein alpha s2-like A, pseudogene	CSN1S2AP	1.19469	0.0172655
iodotyrosine deiodinase	IYD	1.19423	0.0437203
transient receptor potential cation channel, subfamily M, member 3	TRPM3	1.19269	0.0344586
ubiquitin specific peptidase 2	USP2	1.19172	0.043483
ATP/GTP binding protein-like 5	AGBL5	1.19137	0.0452233
serine/threonine kinase 35	STK35	1.19124	0.0217307
1-aminocyclopropane-1-carboxylate synthase homolog (Arabidopsis)(non-functional)-like	ACCSL	1.1911	0.0496882
phosphatase and actin regulator 1	PHACTR1	1.1901	0.0238138
proline-rich nuclear receptor coactivator 1	PNRC1	1.18974	0.0427859
synaptotagmin XVI	SYT16	1.1886	0.0492497
TSC22 domain family, member 3	TSC22D3	1.18731	0.0381747
acyl-CoA dehydrogenase, long chain	ACADL	1.18706	0.0409575
paraoxonase 1	PON1	1.18693	0.0167326
vasoactive intestinal peptide	VIP	1.18686	0.00983064
prolyl-tRNA synthetase associated domain containing 1, pseudogene	PRORSD1P	1.18606	0.0399294
hypothetical LOC79015	LOC79015	1.18589	0.0205811
hypothetical LOC100128292	LOC100128292	1.18584	0.0238741
forkhead box A3	FOXA3	1.18519	0.0322798
v-maf musculoaponeurotic fibrosarcoma oncogene homolog K (avian)	MAFK	1.18517	0.0430344
aquaporin 4	AQP4	1.18485	0.0123352
sucrase-isomaltase (alpha-glucosidase)	SI	1.18471	0.0111384
glypican 5	GPC5	1.18364	0.00961747
coiled-coil domain containing 46	CCDC46	1.18307	0.0452233
muscleblind-like 2 (Drosophila)	MBNL2	1.18184	0.0413942
chromosome 17 open reading frame 46	C17orf46	1.18175	0.0437824
interferon, alpha 8	IFNA8	1.18134	0.0121926
proline-rich nuclear receptor coactivator 2	PNRC2	1.18124	0.0316844
acyl-CoA thioesterase 1	ACOT1	1.18066	0.0462412
small nucleolar RNA, C/D box 95	SNORD95	1.18011	0.0236013
DEAQ box RNA-dependent ATPase 1	DQX1	1.17939	0.031205
microtubule-associated protein, RP/EB family, member 2	MAPRE2	1.179	0.0451354
olfactory receptor, family 9, subfamily G, member 4	OR9G4	1.17791	0.0437463
gamma-aminobutyric acid (GABA) A receptor, gamma 3	GABRG3	1.17727	0.0380322
von Willebrand factor C domain containing 2	VWC2	1.17662	0.0107701
somatostatin receptor 4	SSTR4	1.17639	0.0166864
DEAD (Asp-Glu-Ala-Asp) box polypeptide 3, X-linked	DDX3X	1.17522	0.0435667
polycystic kidney disease (polycystin) and REJ homolog (sperm receptor for egg jelly homolog, sea urchin)	PKDREJ	1.17514	0.0412874
transcription factor 21	TCF21	1.17493	0.027763
H2A histone family, member V	H2AFV	1.17478	0.0393437
deafness, autosomal recessive 31	DFNB31	1.17477	0.0435249
CDP-diacylglycerol synthase (phosphatidate cytidylyltransferase) 1	CDS1	1.17454	0.00649521
cell death-inducing DFFA-like effector c pseudogene	CIDECP	1.1724	0.0446449
olfactory receptor, family 6, subfamily C, member 70	OR6C70	1.17228	0.0173918
aurora kinase B	AURKB	1.17187	0.0374662
olfactory receptor, family 5, subfamily M, member 8	OR5M8	1.17181	0.0446449
proline rich 7 (synaptic)	PRR7	1.17177	0.04321
sparc/osteonectin, cwcv and kazal-like domains proteoglycan (testican) 3	SPOCK3	1.17148	0.0291091
contactin 6	CNTN6	1.17053	0.0428564
DET1 and DDB1 associated 1	DDA1	1.16907	0.0117093
mitochondrial carrier homolog 1 (C. elegans)	MTCH1	1.16709	0.0487401
tachykinin receptor 3	TACR3	1.16693	0.0345868
spermatogenesis associated 2-like	SPATA2L	1.16662	0.0213035
GTP binding protein overexpressed in skeletal muscle	GEM	1.16538	0.0498462
LLP homolog, long-term synaptic facilitation (Aplysia)	LLPH	1.1652	0.0466632
eukaryotic translation initiation factor 5A-like 1	EIF5AL1	1.16501	0.024077
POU class 6 homeobox 1	POU6F1	1.16402	0.0467005
periostin, osteoblast specific factor	POSTN	1.16292	0.0366446
chromosome 8 open reading frame 45	C8orf45	1.16251	0.0474425
solute carrier family 25 (mitochondrial carrier, brain), member 14	SLC25A14	1.16214	0.0462731
high-mobility group box 3	HMGB3	1.16192	0.043196
T-cell lymphoma invasion and metastasis 2	TIAM2	1.1616	0.0470456
mortality factor 4 like 1	MORF4L1	1.16024	0.0328019
STON1-GTF2A1L readthrough	STON1-GTF2A1L	1.15788	0.0452233
chloride channel accessory 4	CLCA4	1.15729	0.0346966
B-cell translocation gene 1, anti-proliferative	BTG1	1.15673	0.0346465
microcephalin 1	MCPH1	1.15515	0.0448071
poly(A) polymerase beta (testis specific)	PAPOLB	1.15506	0.0415898
atrophin 1	ATN1	1.15487	0.0459821
thrombospondin 2	THBS2	1.15469	0.0436849
grainyhead-like 1 (Drosophila)	GRHL1	1.15287	0.04119
purine-rich element binding protein G	PURG	1.15205	0.0315064
interleukin enhancer binding factor 2, 45kDa	ILF2	1.15122	0.0315172
orofacial cleft 1 candidate 1	OFCC1	1.15022	0.0323024
MYB binding protein (P160) 1a	MYBBP1A	0.870137	0.0467143
megakaryoblastic leukemia (translocation) 1	MKL1	0.868526	0.0294866
zinc finger protein 181	ZNF181	0.867633	0.0334565
profilin 1	PFN1	0.86715	0.0359423
RAB interacting factor	RABIF	0.865021	0.0314669
SWI/SNF related, matrix associated, actin dependent regulator of chromatin, subfamily c, member 2	SMARCC2	0.863918	0.0469745
thioredoxin interacting protein	TXNIP	0.862027	0.0428389
zinc finger and SCAN domain containing 5A	ZSCAN5A	0.860678	0.0335335
ubiquinol-cytochrome c reductase core protein II	UQCRC2	0.860036	0.0279527
POTE ankyrin domain family, member F	POTEF	0.85979	0.0396983
P450 (cytochrome) oxidoreductase	POR	0.859026	0.0458071
SMG1 homolog, phosphatidylinositol 3-kinase-related kinase (C. elegans)	SMG1	0.858841	0.0439786
8-oxoguanine DNA glycosylase	OGG1	0.858398	0.0342158
sulfatase modifying factor 1	SUMF1	0.858078	0.0459821
aspartyl aminopeptidase	DNPEP	0.858006	0.0400226
cytokine induced apoptosis inhibitor 1	CIAPIN1	0.857623	0.0385498
inhibitor of growth family, member 1	ING1	0.857287	0.0254212
NOP2 nucleolar protein homolog (yeast)	NOP2	0.856994	0.023247
chromosome 1 open reading frame 84	C1orf84	0.856268	0.00895486
cofilin 1 (non-muscle)	CFL1	0.85597	0.0193939
Rab9 effector protein with kelch motifs	RABEPK	0.855287	0.0415898
actin, gamma 1	ACTG1	0.855247	0.00661967
unc-13 homolog D (C. elegans)	UNC13D	0.85469	0.0425986
actin, beta	ACTB	0.8541	0.0153729
nuclear factor of activated T-cells, cytoplasmic, calcineurin-dependent 2 interacting protein	NFATC2IP	0.853834	0.0236013
STE20-related kinase adaptor alpha	STRADA	0.853669	0.0441613
protein phosphatase 1, regulatory (inhibitor) subunit 7	PPP1R7	0.853376	0.0177201
exosome component 10	EXOSC10	0.853348	0.0433059
glycine cleavage system protein H (aminomethyl carrier)	GCSH	0.8526	0.0373044
cystatin B (stefin B)	CSTB	0.851888	0.0349816
protein tyrosine phosphatase, receptor type, C-associated protein	PTPRCAP	0.851494	0.0404918
suppressor of fused homolog (Drosophila)	SUFU	0.850819	0.0322589
guanine nucleotide binding protein (G protein), alpha inhibiting activity polypeptide 2	GNAI2	0.850245	0.0371551
hydroxyacyl-CoA dehydrogenase/3-ketoacyl-CoA thiolase/enoyl-CoA hydratase (trifunctional protein), alpha subunit	HADHA	0.849987	0.0334772
exosome component 4	EXOSC4	0.849921	0.0164047
serine active site containing 1	SERAC1	0.849642	0.0320954
vacuolar protein sorting 39 homolog (S. cerevisiae)	VPS39	0.849421	0.0321977
enhancer of mRNA decapping 4	EDC4	0.848944	0.0302498
major vault protein	MVP	0.846764	0.0324067
aurora kinase A	AURKA	0.84628	0.0429093
pentatricopeptide repeat domain 2	PTCD2	0.846236	0.0399456
ubiquitin protein ligase E3B	UBE3B	0.845808	0.0441611
disrupted in schizophrenia 1	DISC1	0.845704	0.0408367
eukaryotic translation initiation factor 2B, subunit 2 beta, 39kDa	EIF2B2	0.845496	0.040946
chromobox homolog 1	CBX1	0.845474	0.0416922
sterile alpha motif and leucine zipper containing kinase AZK	ZAK	0.845233	0.0494778
transmembrane BAX inhibitor motif containing 6	TMBIM6	0.845167	0.0353713
glutathione S-transferase pi 1	GSTP1	0.844841	0.0326486
mitochondrial trans-2-enoyl-CoA reductase	MECR	0.844688	0.0319366
isoprenylcysteine carboxyl methyltransferase	ICMT	0.843745	0.030234
CoA synthase	COASY	0.841788	0.0192737
protein tyrosine phosphatase, receptor type, f polypeptide (PTPRF), interacting protein (liprin), alpha 1	PPFIA1	0.841755	0.0408949
capping protein (actin filament) muscle Z-line, beta	CAPZB	0.841465	0.0159287
prefoldin subunit 6	PFDN6	0.841328	0.0367722
solute carrier family 7, member 6 opposite strand	SLC7A6OS	0.841237	0.0420133
tropomyosin 3	TPM3	0.841027	0.0206625
euchromatic histone-lysine N-methyltransferase 1	EHMT1	0.84032	0.0456355
C-terminal binding protein 1	CTBP1	0.840176	0.0434979
presenilin 2 (Alzheimer disease 4)	PSEN2	0.84002	0.0342102
ATPase, H+ transporting, lysosomal V0 subunit a2	ATP6V0A2	0.839932	0.044504
zinc finger and BTB domain containing 7B	ZBTB7B	0.839901	0.0391903
coatomer protein complex, subunit gamma 2	COPG2	0.839856	0.0442247
mitochondrial ribosomal protein L2	MRPL2	0.839663	0.0292954
MORC family CW-type zinc finger 2	MORC2	0.83953	0.0476031
proteasome (prosome, macropain) assembly chaperone 1	PSMG1	0.839524	0.006759
methylthioadenosine phosphorylase	MTAP	0.839389	0.0230944
protein O-fucosyltransferase 1	POFUT1	0.839234	0.0335964
family with sequence similarity 86, member A	FAM86A	0.838707	0.0191301
ubiquitin specific peptidase 4 (proto-oncogene)	USP4	0.838476	0.0468176
FtsJ homolog 1 (E. coli)	FTSJ1	0.838405	0.0167526
DEAD (Asp-Glu-Ala-Asp) box polypeptide 39B	DDX39B	0.837922	0.0289626
malate dehydrogenase 2, NAD (mitochondrial)	MDH2	0.837736	0.023247
XK, Kell blood group complex subunit-related family, member 8	XKR8	0.837711	0.0176385
shisa homolog 5 (Xenopus laevis)	SHISA5	0.837671	0.0271555
brain and reproductive organ-expressed (TNFRSF1A modulator)	BRE	0.83738	0.046165
chromosome 11 open reading frame 21	C11orf21	0.837346	0.0294866
NFS1 nitrogen fixation 1 homolog (S. cerevisiae)	NFS1	0.837192	0.0146698
solute carrier family 4, anion exchanger, member 2 (erythrocyte membrane protein band 3-like 1)	SLC4A2	0.83715	0.00921634
polymerase (RNA) III (DNA directed) polypeptide H (22.9kD)	POLR3H	0.836896	0.0219865
zinc finger, FYVE domain containing 26	ZFYVE26	0.836739	0.0206676
staphylococcal nuclease and tudor domain containing 1	SND1	0.836597	0.0493097
CTD (carboxy-terminal domain, RNA polymerase II, polypeptide A) small phosphatase 1	CTDSP1	0.836332	0.0185862
mitochondrial ribosomal protein L17	MRPL17	0.836078	0.0462412
mitogen-activated protein kinase-activated protein kinase 3	MAPKAPK3	0.836058	0.0491891
notch 2 N-terminal like	NOTCH2NL	0.835851	0.0172655
nuclear receptor co-repressor 1 pseudogene	C20orf191	0.835492	0.0261854
clathrin, light chain A	CLTA	0.835071	0.0150751
flavin containing monooxygenase 5	FMO5	0.834934	0.044028
sulfite oxidase	SUOX	0.83474	0.0199198
heterogeneous nuclear ribonucleoprotein U-like 2	HNRNPUL2	0.834173	0.0413103
pseudouridylate synthase 1	PUS1	0.834089	0.0449915
enolase 1, (alpha)	ENO1	0.834076	0.0150248
general transcription factor IIIC, polypeptide 2, beta 110kDa	GTF3C2	0.833943	0.0123528
DDB1 and CUL4 associated factor 11	DCAF11	0.833772	0.0403431
chromosome 17 open reading frame 81	C17orf81	0.833669	0.0340902
damage-specific DNA binding protein 2, 48kDa	DDB2	0.833654	0.0254359
chloride intracellular channel 1	CLIC1	0.833551	0.0294828
neuralized homolog 4 (Drosophila)	NEURL4	0.83297	0.0180565
solute carrier family 37 (glucose-6-phosphate transporter), member 4	SLC37A4	0.832449	0.0164711
actin related protein 2/3 complex, subunit 4, 20kDa	ARPC4	0.832306	0.04572
zinc finger protein 200	ZNF200	0.831794	0.04229
zinc finger and BTB domain containing 24	ZBTB24	0.831625	0.0495299
alpha-methylacyl-CoA racemase	AMACR	0.831582	0.0123352
CUE domain containing 1	CUEDC1	0.831497	0.0186296
chromosome 6 open reading frame 97	C6orf97	0.831342	0.0410334
transmembrane protein 41B	TMEM41B	0.829965	0.0426031
phosphoglycerate mutase 1 (brain)	PGAM1	0.82945	0.0176977
hydroxysteroid (17-beta) dehydrogenase 10	HSD17B10	0.829419	0.0166253
SREBF chaperone	SCAP	0.829359	0.0141169
ribosomal RNA processing 1 homolog B (S. cerevisiae)	RRP1B	0.828963	0.0146698
coiled-coil-helix-coiled-coil-helix domain containing 8	CHCHD8	0.828924	0.0240744
folliculin	FLCN	0.828868	0.0411539
annexin A2 pseudogene 1	ANXA2P1	0.828645	0.0349776
nuclear transcription factor Y, gamma	NFYC	0.828522	0.0371412
CD53 molecule	CD53	0.827764	0.00541969
chromosome 2 open reading frame 56	C2orf56	0.827684	0.0262792
ubiquitin-like 7 (bone marrow stromal cell-derived)	UBL7	0.827258	0.033968
unc-51-like kinase 2 (C. elegans)	ULK2	0.827253	0.0406126
enoyl CoA hydratase, short chain, 1, mitochondrial	ECHS1	0.826921	0.0299531
transmembrane protein 107	TMEM107	0.826834	0.0177784
zinc finger protein 160	ZNF160	0.826781	0.021314
centrosomal protein 152kDa	CEP152	0.826659	0.0150173
G protein-coupled receptor kinase 6	GRK6	0.826658	0.0388589
steroid 5 alpha-reductase 3	SRD5A3	0.826591	0.0167526
proteasome (prosome, macropain) 26S subunit, ATPase, 5	PSMC5	0.826585	0.0303742
protein phosphatase 2, regulatory subunit B', delta	PPP2R5D	0.826496	0.00751158
mesoderm development candidate 2	MESDC2	0.82633	0.0105422
aarF domain containing kinase 4	ADCK4	0.826322	0.0122743
SCY1-like 1 (S. cerevisiae)	SCYL1	0.826051	0.0130186
zinc finger protein 781	ZNF781	0.82605	0.0189847
D site of albumin promoter (albumin D-box) binding protein	DBP	0.825851	0.018201
ubiquitin specific peptidase 19	USP19	0.825749	0.00916397
zinc finger, CCHC domain containing 9	ZCCHC9	0.825718	0.0433566
cAMP responsive element binding protein-like 2	CREBL2	0.825541	0.0256331
signal transducer and activator of transcription 3 (acute-phase response factor)	STAT3	0.825536	0.0224825
hypoxia up-regulated 1	HYOU1	0.825527	0.0380343
fumarate hydratase	FH	0.825351	0.0395448
dedicator of cytokinesis 2	DOCK2	0.825085	0.0377871
transmembrane protein 48	TMEM48	0.825053	0.029768
euchromatic histone-lysine N-methyltransferase 2	EHMT2	0.825	0.0187462
myotubularin related protein 3	MTMR3	0.824924	0.0474171
family with sequence similarity 58, member A	FAM58A	0.824895	0.0210145
Fanconi anemia, complementation group F	FANCF	0.824802	0.0180726
protein phosphatase 4, catalytic subunit	PPP4C	0.824718	0.0391595
aminolevulinate dehydratase	ALAD	0.824691	0.0186588
RAB39, member RAS oncogene family	RAB39	0.82467	0.0185862
DEAD (Asp-Glu-Ala-Asp) box polypeptide 17	DDX17	0.82458	0.041111
transmembrane protein 106A	TMEM106A	0.824487	0.0177784
caspase recruitment domain family, member 8	CARD8	0.824439	0.0372822
cleavage stimulation factor, 3' pre-RNA, subunit 2, 64kDa	CSTF2	0.824366	0.0226577
chromosome 19 open reading frame 12	C19orf12	0.824336	0.0186237
cytoplasmic FMR1 interacting protein 2	CYFIP2	0.82399	0.0362421
F-box and WD repeat domain containing 8	FBXW8	0.823964	0.0432071
Fas apoptotic inhibitory molecule	FAIM	0.823566	0.0406807
WW domain containing E3 ubiquitin protein ligase 2	WWP2	0.823302	0.0271812
triosephosphate isomerase 1	TPI1	0.823159	0.0358295
signal recognition particle receptor (docking protein)	SRPR	0.823092	0.0318647
hematopoietic cell-specific Lyn substrate 1	HCLS1	0.823024	0.0146883
FYN binding protein	FYB	0.82295	0.00871306
transmembrane protein 218	TMEM218	0.822764	0.0286475
polymerase (RNA) I polypeptide A, 194kDa	POLR1A	0.822668	0.0149163
zinc finger protein 182	ZNF182	0.822522	0.0349776
regulator of G-protein signaling 19	RGS19	0.822149	0.00852571
chromosome 22 open reading frame 39	C22orf39	0.821827	0.0130186
polymerase (DNA directed), alpha 2 (70kD subunit)	POLA2	0.821747	0.0052891
RNA binding motif protein 28	RBM28	0.821562	0.040447
sprouty-related, EVH1 domain containing 1	SPRED1	0.821498	0.00993078
dual specificity phosphatase 18	DUSP18	0.821039	0.0184109
mannosidase, beta A, lysosomal-like	MANBAL	0.820953	0.0157286
calcium/calmodulin-dependent protein kinase I	CAMK1	0.820824	0.0198672
zinc finger protein 555	ZNF555	0.820673	0.035038
integrin, alpha L (antigen CD11A (p180), lymphocyte function-associated antigen 1; alpha polypeptide)	ITGAL	0.820599	0.0476031
acyl-CoA synthetase short-chain family member 1	ACSS1	0.820381	0.033931
actin related protein 2/3 complex, subunit 1B, 41kDa	ARPC1B	0.820273	0.0371925
3-phosphoinositide dependent protein kinase-1	PDPK1	0.820176	0.0206208
WD repeat domain 18	WDR18	0.820144	0.0494893
potassium channel, subfamily K, member 6	KCNK6	0.820104	0.035167
glycogen synthase kinase 3 alpha	GSK3A	0.819864	0.0136434
MON1 homolog B (yeast)	MON1B	0.819776	0.0246861
RNA binding motif protein 14	RBM14	0.819605	0.0403104
chromosome 19 open reading frame 61	C19orf61	0.8189	0.00462924
histone H4 transcription factor	HINFP	0.818474	0.0230968
regulator of chromosome condensation 2	RCC2	0.818441	0.0148518
mechanistic target of rapamycin (serine/threonine kinase)	MTOR	0.818264	0.0145805
COX18 cytochrome c oxidase assembly homolog (S. cerevisiae)	COX18	0.81816	0.0440975
gamma-glutamyl carboxylase	GGCX	0.818074	0.024773
nucleoporin 93kDa	NUP93	0.817918	0.0160143
FYVE, RhoGEF and PH domain containing 3	FGD3	0.81776	0.0222461
karyopherin alpha 1 (importin alpha 5)	KPNA1	0.817694	0.0280885
TAF5 RNA polymerase II, TATA box binding protein (TBP)-associated factor, 100kDa	TAF5	0.817523	0.0246861
zinc finger, MYM-type 3	ZMYM3	0.81746	0.0277285
SWI/SNF related, matrix associated, actin dependent regulator of chromatin, subfamily a, member 2	SMARCA2	0.817453	0.0295832
acyl-CoA synthetase short-chain family member 2	ACSS2	0.817358	0.0158644
NOP16 nucleolar protein homolog (yeast)	NOP16	0.817341	0.031205
chromosome 5 open reading frame 53	C5orf53	0.817185	0.0291091
RNA binding motif protein 10	RBM10	0.816977	0.037444
F-box and WD repeat domain containing 5	FBXW5	0.816797	0.0238741
chromosome 9 open reading frame 91	C9orf91	0.816683	0.0427177
suppressor of cancer cell invasion	SCAI	0.816679	0.0329418
hypothetical LOC339803	LOC339803	0.816531	0.0447485
THAP domain containing 11	THAP11	0.815902	0.0294367
activating transcription factor 6 beta	ATF6B	0.815861	0.0163792
UDP-N-acetyl-alpha-D-galactosamine:polypeptide N-acetylgalactosaminyltransferase 2 (GalNAc-T2)	GALNT2	0.815699	0.038327
ankyrin repeat domain 5	ANKRD5	0.815651	0.0385498
zinc finger protein 81	ZNF81	0.81559	0.0371412
chromosome 6 open reading frame 114	C6orf114	0.81554	0.0165409
glutaryl-CoA dehydrogenase	GCDH	0.815516	0.0237335
WD repeat domain 1	WDR1	0.815345	0.0252003
ras homolog gene family, member C	RHOC	0.815176	0.0239268
cyclin-dependent kinase 2 associated protein 2	CDK2AP2	0.814965	0.0143087
protein phosphatase 2, regulatory subunit A, alpha	PPP2R1A	0.814961	0.00327215
tripartite motif containing 35	TRIM35	0.814755	0.0230334
CTD (carboxy-terminal domain, RNA polymerase II, polypeptide A) small phosphatase 2	CTDSP2	0.81453	0.0446449
citrate synthase	CS	0.814495	0.0150248
family with sequence similarity 127, member A	FAM127A	0.814366	0.0392915
adenylosuccinate lyase	ADSL	0.814354	0.0227608
NADH dehydrogenase (ubiquinone) 1 alpha subcomplex, 9, 39kDa	NDUFA9	0.814309	0.00810278
cyclin G associated kinase	GAK	0.814274	0.0122327
TATA box binding protein (TBP)-associated factor, RNA polymerase I, B, 63kDa	TAF1B	0.814274	0.0274795
tetratricopeptide repeat domain 35	TTC35	0.814198	0.0480692
phosphatidylinositol-4-phosphate 5-kinase, type I, alpha	PIP5K1A	0.814197	0.0287678
proline rich 11	PRR11	0.813905	0.0350514
SMAD family member 4	SMAD4	0.813852	0.0498976
phosphoenolpyruvate carboxykinase 2 (mitochondrial)	PCK2	0.813739	0.0326032
tubulin tyrosine ligase-like family, member 12	TTLL12	0.813695	0.0194812
cell cycle associated protein 1	CAPRIN1	0.813658	0.0210561
solute carrier family 25 (mitochondrial carrier; peroxisomal membrane protein, 34kDa), member 17	SLC25A17	0.813629	0.0157589
ORAI calcium release-activated calcium modulator 3	ORAI3	0.813629	0.0440599
casein kinase 2, alpha 1 polypeptide pseudogene	CSNK2A1P	0.813569	0.00690112
opioid growth factor receptor	OGFR	0.813562	0.0331632
Ral GTPase activating protein, beta subunit (non-catalytic)	RALGAPB	0.813544	0.0481341
cullin 1	CUL1	0.813478	0.0471212
WD repeat domain 55	WDR55	0.813459	0.023247
taste receptor, type 2, member 14	TAS2R14	0.813375	0.0347858
apolipoprotein B receptor	APOBR	0.812968	0.0359124
motile sperm domain containing 1	MOSPD1	0.812914	0.030602
family with sequence similarity 82, member B	FAM82B	0.812485	0.0396395
regulatory factor X-associated protein	RFXAP	0.812475	0.0127824
pleckstrin homology domain containing, family B (evectins) member 2	PLEKHB2	0.812464	0.0200614
GDP-mannose pyrophosphorylase A	GMPPA	0.812423	0.0219865
serpin peptidase inhibitor, clade A (alpha-1 antiproteinase, antitrypsin), member 1	SERPINA1	0.81241	0.0179164
nucleoporin 214kDa	NUP214	0.812281	0.0193853
solute carrier family 29 (nucleoside transporters), member 3	SLC29A3	0.812088	0.00460873
zinc finger protein 763	ZNF763	0.812041	0.0437207
mRNA turnover 4 homolog (S. cerevisiae)	MRTO4	0.811901	0.0359295
LIM domain kinase 1	LIMK1	0.811884	0.00635597
mitogen-activated protein kinase kinase kinase 7	MAP3K7	0.811441	0.0404696
toll-interleukin 1 receptor (TIR) domain containing adaptor protein	TIRAP	0.811422	0.0324134
OTU domain, ubiquitin aldehyde binding 1	OTUB1	0.81126	0.0237335
ATP synthase, H+ transporting, mitochondrial Fo complex, subunit B1	ATP5F1	0.811196	0.0166344
golgi glycoprotein 1	GLG1	0.81106	0.0205586
SIN3 homolog B, transcription regulator (yeast)	SIN3B	0.810959	0.0395585
v-myc myelocytomatosis viral oncogene homolog 1, lung carcinoma derived (avian)	MYCL1	0.810884	0.00525283
FK506 binding protein 4, 59kDa	FKBP4	0.810854	0.0340902
interleukin 2 receptor, gamma	IL2RG	0.810738	0.0219966
ankyrin repeat and sterile alpha motif domain containing 1A	ANKS1A	0.81071	0.0251764
ankyrin repeat domain 16	ANKRD16	0.810419	0.00507023
TBC1 domain family, member 10C	TBC1D10C	0.810295	0.0243806
UPF2 regulator of nonsense transcripts homolog (yeast)	UPF2	0.810055	0.0401431
rhomboid 5 homolog 2 (Drosophila)	RHBDF2	0.810054	0.0234013
chromosome 12 open reading frame 49	C12orf49	0.80999	0.0123452
family with sequence similarity 65, member A	FAM65A	0.80998	0.0493755
phosphopantothenoylcysteine synthetase	PPCS	0.809688	0.015028
proteasome (prosome, macropain) activator subunit 3 (PA28 gamma; Ki)	PSME3	0.809583	0.0337617
ATP synthase, H+ transporting, mitochondrial F1 complex, beta polypeptide	ATP5B	0.809582	0.00811285
solute carrier family 16, member 3 (monocarboxylic acid transporter 4)	SLC16A3	0.809558	0.023553
aminoacyl tRNA synthetase complex-interacting multifunctional protein 2	AIMP2	0.809536	0.011383
hydroxyacyl-CoA dehydrogenase	HADH	0.808946	0.0143038
TYRO protein tyrosine kinase binding protein	TYROBP	0.808713	0.0277388
zinc finger protein 485	ZNF485	0.808528	0.0335786
protein arginine methyltransferase 2	PRMT2	0.808455	0.0347546
isocitrate dehydrogenase 3 (NAD+) alpha	IDH3A	0.808404	0.0294828
nuclear receptor 2C2-associated protein	NR2C2AP	0.808269	0.0243636
WD repeat domain 82	WDR82	0.808052	0.0184799
bolA homolog 1 (E. coli)	BOLA1	0.80799	0.0277076
transmembrane protein 179B	TMEM179B	0.807984	0.0257553
proteasome (prosome, macropain) 26S subunit, non-ATPase, 3	PSMD3	0.807917	0.0092707
acidic (leucine-rich) nuclear phosphoprotein 32 family, member A	ANP32A	0.807715	0.00113589
golgi brefeldin A resistant guanine nucleotide exchange factor 1	GBF1	0.807575	0.00962954
microspherule protein 1	MCRS1	0.807572	0.00695321
RNA binding motif protein 4B	RBM4B	0.807536	0.0347685
lectin, mannose-binding 2	LMAN2	0.807517	0.0422451
proteasome (prosome, macropain) subunit, beta type, 10	PSMB10	0.80748	0.0386356
KTI12 homolog, chromatin associated (S. cerevisiae)	KTI12	0.807395	0.0219865
zinc finger protein 64 homolog (mouse)	ZFP64	0.807317	0.0149163
signal-regulatory protein gamma	SIRPG	0.807299	0.0427566
hypothetical LOC401884	MGC57346	0.806977	0.0399637
zinc finger protein 276	ZNF276	0.806885	0.04119
TruB pseudouridine (psi) synthase homolog 2 (E. coli)	TRUB2	0.806864	0.0099083
potassium channel tetramerisation domain containing 5	KCTD5	0.806854	0.0389528
cAMP responsive element binding protein 5	CREB5	0.806738	0.0200623
G protein-coupled receptor 114	GPR114	0.806623	0.0491659
glycogen synthase 1 (muscle)	GYS1	0.806428	0.0349904
ring finger protein 5	RNF5	0.806068	0.00983064
glutaminase	GLS	0.80604	0.0499415
RAP1 GTPase activating protein 2	RAP1GAP2	0.805914	0.013849
ATG4 autophagy related 4 homolog B (S. cerevisiae)	ATG4B	0.805677	0.0235688
ring finger protein 185	RNF185	0.805661	0.0364746
pleckstrin homology domain containing, family M, member 3	PLEKHM3	0.805636	0.0446494
EPWW6493	LOC100129831	0.805445	0.0343033
coronin, actin binding protein, 1B	CORO1B	0.80535	0.0381151
gem (nuclear organelle) associated protein 7	GEMIN7	0.805338	0.0324868
tectonin beta-propeller repeat containing 2	TECPR2	0.80524	0.0180726
dynactin 5 (p25)	DCTN5	0.805202	0.0436384
heat shock 70kDa protein 8	HSPA8	0.805145	0.00464934
phospholipid scramblase 3	PLSCR3	0.804714	0.045864
F-box protein 6	FBXO6	0.804422	0.0113995
proline synthetase co-transcribed homolog (bacterial)	PROSC	0.804363	0.0109586
UTP14, U3 small nucleolar ribonucleoprotein, homolog A (yeast)	UTP14A	0.804339	0.00926796
arylsulfatase family, member K	ARSK	0.804202	0.0408901
coatomer protein complex, subunit zeta 1	COPZ1	0.804124	0.0443286
cAMP responsive element binding protein 1	CREB1	0.804084	0.0267182
mitochondrial ribosomal protein S14	MRPS14	0.803891	0.023247
phosphatidylinositol glycan anchor biosynthesis, class V	PIGV	0.803722	0.00894415
coiled-coil domain containing 97	CCDC97	0.803673	0.00916397
aconitase 2, mitochondrial	ACO2	0.803667	0.00757852
STAM binding protein	STAMBP	0.803074	0.022761
nudix (nucleoside diphosphate linked moiety X)-type motif 16	NUDT16	0.803031	0.043853
proteasome (prosome, macropain) 26S subunit, non-ATPase, 8	PSMD8	0.802805	0.0120484
ubiquitin specific peptidase 40	USP40	0.802755	0.00640292
transcription factor EB	TFEB	0.802754	0.01789
IKBKB interacting protein	IKBIP	0.802721	0.00983064
family with sequence similarity 135, member A	FAM135A	0.802244	0.0460301
CD46 molecule, complement regulatory protein	CD46	0.802185	0.0354078
cell death-inducing DFFA-like effector b	CIDEB	0.802179	0.00676178
membrane bound O-acyltransferase domain containing 7	MBOAT7	0.802162	0.0466143
coatomer protein complex, subunit epsilon	COPE	0.80208	0.0200994
t-complex 11 (mouse)-like 1	TCP11L1	0.802067	0.0217495
intercellular adhesion molecule 3	ICAM3	0.801865	0.0377227
protein kinase C, iota	PRKCI	0.801796	0.0295873
tripartite motif containing 52	TRIM52	0.801534	0.031319
signal sequence receptor, alpha	SSR1	0.801507	0.0210369
vacuolar protein sorting 53 homolog (S. cerevisiae)	VPS53	0.801479	0.0214948
TBC1 domain family, member 10A	TBC1D10A	0.80145	0.0439752
ubiquinol-cytochrome c reductase complex chaperone	UQCC	0.801377	0.0340902
X-linked inhibitor of apoptosis	XIAP	0.801342	0.0413763
carboxylesterase 2	CES2	0.801129	0.0155271
ring finger protein 149	RNF149	0.801083	0.0291091
vacuolar protein sorting 53 homolog (S. cerevisiae)	VPS53	0.800952	0.0277285
carbamoyl-phosphate synthetase 2, aspartate transcarbamylase, and dihydroorotase	CAD	0.800921	0.00220143
aldolase C, fructose-bisphosphate	ALDOC	0.800912	0.0197751
ubiquitin carboxyl-terminal esterase L3 (ubiquitin thiolesterase)	UCHL3	0.800624	0.0403589
centrin, EF-hand protein, 3	CETN3	0.800615	0.00983064
c-myc binding protein	MYCBP	0.800592	0.0478563
MUS81 endonuclease homolog (S. cerevisiae)	MUS81	0.800455	0.0283454
DnaJ (Hsp40) homolog, subfamily C, member 24	DNAJC24	0.800289	0.0191149
activating signal cointegrator 1 complex subunit 3	ASCC3	0.800162	0.0389226
Rac GTPase activating protein 1	RACGAP1	0.800132	0.00756718
TAO kinase 3	TAOK3	0.799985	0.0461918
mitogen-activated protein kinase kinase 1	MAP2K1	0.799946	0.0348803
Wiskott-Aldrich syndrome (eczema-thrombocytopenia)	WAS	0.799906	0.0124718
cytohesin 4	CYTH4	0.799848	0.0167526
G-rich RNA sequence binding factor 1	GRSF1	0.79965	0.0175883
carnitine palmitoyltransferase 2	CPT2	0.799588	0.0373044
elongation factor Tu GTP binding domain containing 1	EFTUD1	0.799567	0.027041
PBX/knotted 1 homeobox 1	PKNOX1	0.799558	0.04119
itchy E3 ubiquitin protein ligase homolog (mouse)	ITCH	0.799438	0.0411719
methylenetetrahydrofolate reductase (NAD(P)H)	MTHFR	0.799376	0.0458361
phosphoribosyl pyrophosphate amidotransferase	PPAT	0.799298	0.0221307
interleukin 16 (lymphocyte chemoattractant factor)	IL16	0.799297	0.0148232
ring finger protein 214	RNF214	0.799025	0.0460129
hexokinase 1	HK1	0.799008	0.0144008
RuvB-like 2 (E. coli)	RUVBL2	0.798875	0.0239625
cytochrome b-561 domain containing 1	CYB561D1	0.798871	0.00578682
Lix1 homolog (mouse)-like	LIX1L	0.798758	0.0360015
splicing factor 3a, subunit 3, 60kDa	SF3A3	0.798714	0.00612226
ubiquitin specific peptidase 32	USP32	0.798552	0.0441663
PTK2B protein tyrosine kinase 2 beta	PTK2B	0.798237	0.0432071
glucose-6-phosphate dehydrogenase	G6PD	0.798224	0.0377825
lysophosphatidic acid receptor 1	LPAR1	0.798186	0.0326787
dihydrouridine synthase 2-like, SMM1 homolog (S. cerevisiae)	DUS2L	0.79808	0.0356712
HEAT repeat containing 5A	HEATR5A	0.797988	0.0338826
eukaryotic translation initiation factor 4 gamma, 1	EIF4G1	0.7979	0.0406807
cytochrome P450, family 2, subfamily R, polypeptide 1	CYP2R1	0.797767	0.0078666
DEAD (Asp-Glu-Ala-Asp) box polypeptide 39B	DDX39B	0.797719	0.0195715
intestinal cell (MAK-like) kinase	ICK	0.797511	0.0452233
phosphoglycerate mutase 1 (brain)	PGAM1	0.797505	0.0226722
HIR histone cell cycle regulation defective homolog A (S. cerevisiae)	HIRA	0.797504	0.0067169
ribosomal protein L7-like 1	RPL7L1	0.797462	0.0239096
transmembrane protein 43	TMEM43	0.797388	0.0447143
TNF receptor-associated protein 1	TRAP1	0.797149	0.038462
DiGeorge syndrome critical region gene 2	DGCR2	0.797148	0.0410334
vacuolar protein sorting 28 homolog (S. cerevisiae)	VPS28	0.797068	0.0433566
zinc finger protein 384	ZNF384	0.796905	0.00421827
neuroblastoma breakpoint family, member 15	NBPF15	0.796604	0.00184141
transmembrane protein 173	TMEM173	0.796582	0.013278
GTF2I repeat domain containing 2	GTF2IRD2	0.796418	0.00734254
RNA pseudouridylate synthase domain containing 3	RPUSD3	0.796351	0.0139115
NADH dehydrogenase (ubiquinone) 1, alpha/beta subcomplex, 1, 8kDa	NDUFAB1	0.796029	0.0381612
furry homolog (Drosophila)	FRY	0.79592	0.027551
frequently rearranged in advanced T-cell lymphomas 2	FRAT2	0.795909	0.0399456
T-box 21	TBX21	0.7958	0.0346981
transmembrane protein 102	TMEM102	0.795718	0.0168027
coproporphyrinogen oxidase	CPOX	0.795522	0.0178876
TBC1 domain family, member 20	TBC1D20	0.795431	0.0346465
coiled-coil domain containing 125	CCDC125	0.795371	0.0435249
dipeptidyl-peptidase 3	DPP3	0.795305	0.0205183
cyclin D3	CCND3	0.795282	0.0243578
gon-4-like (C. elegans)	GON4L	0.794945	0.0122838
glyoxylate reductase/hydroxypyruvate reductase	GRHPR	0.794907	0.0345737
Rho guanine nucleotide exchange factor (GEF) 40	ARHGEF40	0.794848	0.0403359
ST3 beta-galactoside alpha-2,3-sialyltransferase 2	ST3GAL2	0.794828	0.0186099
Bardet-Biedl syndrome 7	BBS7	0.794701	0.00984767
apolipoprotein B mRNA editing enzyme, catalytic polypeptide-like 3F	APOBEC3F	0.79466	0.0167526
golgi integral membrane protein 4	GOLIM4	0.794505	0.0491609
insulin-like growth factor binding protein 7	IGFBP7	0.794424	0.0408949
sphingosine-1-phosphate receptor 3	S1PR3	0.794409	0.0422003
phosphodiesterase 6D, cGMP-specific, rod, delta	PDE6D	0.794328	0.0281356
ribosomal protein S6 kinase, 90kDa, polypeptide 3	RPS6KA3	0.794303	0.0298596
CSRP2 binding protein	CSRP2BP	0.794221	0.013211
thyroid hormone receptor interactor 4	TRIP4	0.794153	0.047087
UPF3 regulator of nonsense transcripts homolog B (yeast)	UPF3B	0.79402	0.0371925
G-protein signaling modulator 2	GPSM2	0.793705	0.0349776
zinc finger protein 436	ZNF436	0.793489	0.0027427
ataxin 2	ATXN2	0.793449	0.0443819
phosphorylase kinase, gamma 2 (testis)	PHKG2	0.793407	0.012804
acyl-CoA dehydrogenase family, member 10	ACAD10	0.793378	0.0475375
Meckel syndrome, type 1	MKS1	0.793315	0.00547226
PRP6 pre-mRNA processing factor 6 homolog (S. cerevisiae)	PRPF6	0.793263	0.0337283
protein arginine methyltransferase 7	PRMT7	0.793232	0.0253679
mitochondrial ribosomal protein L48	MRPL48	0.793195	0.013849
tyrosine 3-monooxygenase/tryptophan 5-monooxygenase activation protein, gamma polypeptide	YWHAG	0.793192	0.00568168
centrosomal protein 76kDa	CEP76	0.793174	0.0107701
hook homolog 2 (Drosophila)	HOOK2	0.793153	0.0132903
NOP14 nucleolar protein homolog (yeast)	NOP14	0.793122	0.0274761
IKAROS family zinc finger 1 (Ikaros)	IKZF1	0.793053	0.036494
G protein-coupled receptor 155	GPR155	0.793021	0.04119
chitinase 3-like 2	CHI3L2	0.792987	0.0411273
methyltransferase like 3	METTL3	0.792941	0.0406798
protein phosphatase, Mg2+/Mn2+ dependent, 1G	PPM1G	0.792895	0.0193319
testis expressed 10	TEX10	0.792583	0.0397421
RNA (guanine-9-) methyltransferase domain containing 3	RG9MTD3	0.79238	0.022035
pyruvate dehydrogenase (lipoamide) beta	PDHB	0.792319	0.0499856
non-SMC element 1 homolog (S. cerevisiae)	NSMCE1	0.792317	0.0281356
major histocompatibility complex, class II, DM beta	HLA-DMB	0.792218	0.0315498
vesicle-associated membrane protein 8 (endobrevin)	VAMP8	0.792034	0.0207992
dpy-19-like 3 (C. elegans)	DPY19L3	0.791989	0.0160178
solute carrier family 27 (fatty acid transporter), member 4	SLC27A4	0.791986	0.00786626
NIMA (never in mitosis gene a)-related kinase 4	NEK4	0.791921	0.0116584
DnaJ (Hsp40) homolog, subfamily C, member 16	DNAJC16	0.791867	0.0123438
TAF1 RNA polymerase II, TATA box binding protein (TBP)-associated factor, 250kDa	TAF1	0.791717	0.0130186
histamine N-methyltransferase	HNMT	0.791648	0.017683
ring finger protein 213	RNF213	0.791627	0.0294673
2',3'-cyclic nucleotide 3' phosphodiesterase	CNP	0.791393	0.0251876
UTP20, small subunit (SSU) processome component, homolog (yeast)	UTP20	0.791359	0.0220695
kelch domain containing 10	KLHDC10	0.79109	0.0307898
huntingtin interacting protein 1	HIP1	0.791057	0.00918901
bicaudal D homolog 2 (Drosophila)	BICD2	0.791044	0.0205513
aftiphilin	AFTPH	0.790989	0.0440254
leucine-rich repeat kinase 1	LRRK1	0.790913	0.0186356
G protein-coupled receptor 172A	GPR172A	0.790889	0.0131951
chromosome 10 open reading frame 76	C10orf76	0.790699	0.0221361
heterogeneous nuclear ribonucleoprotein A/B	HNRNPAB	0.79069	0.0070552
retinol saturase (all-trans-retinol 13,14-reductase)	RETSAT	0.790575	0.0137243
DDB1 and CUL4 associated factor 10	DCAF10	0.79041	0.0135517
poly(A) polymerase alpha	PAPOLA	0.790131	0.0255573
acidic repeat containing	ACRC	0.789904	0.0122883
gem (nuclear organelle) associated protein 6	GEMIN6	0.789883	0.0322589
mitogen-activated protein kinase 1	MAPK1	0.78987	0.0235742
CDC-like kinase 2, pseudogene	CLK2P	0.789865	0.00906408
nucleoporin 210kDa	NUP210	0.78982	0.00983064
solute carrier family 24 (sodium/potassium/calcium exchanger), member 4	SLC24A4	0.789732	0.0312218
nudix (nucleoside diphosphate linked moiety X)-type motif 9	NUDT9	0.789626	0.00936692
zinc finger family member 673	ZNF673	0.789532	0.0217319
ankyrin repeat and SOCS box containing 13	ASB13	0.789422	0.00405833
RFT1 homolog (S. cerevisiae)	RFT1	0.789401	0.025143
general transcription factor IIH, polypeptide 4, 52kDa	GTF2H4	0.789369	0.0205183
attractin	ATRN	0.789272	0.00271032
geranylgeranyl diphosphate synthase 1	GGPS1	0.78914	0.0196015
sideroflexin 2	SFXN2	0.788971	0.0449656
proteasome (prosome, macropain) 26S subunit, ATPase, 4	PSMC4	0.788967	0.00846738
placenta-specific 8	PLAC8	0.788962	0.00963802
processing of precursor 7, ribonuclease P/MRP subunit (S. cerevisiae)	POP7	0.788785	0.0244765
phosphatidylserine decarboxylase	PISD	0.788569	0.0399456
sphingosine-1-phosphate receptor 4	S1PR4	0.788508	0.041199
mitochondrial ribosomal protein L24	MRPL24	0.788459	0.0292002
3-hydroxymethyl-3-methylglutaryl-CoA lyase	HMGCL	0.788412	0.0195031
coactosin-like 1 (Dictyostelium)	COTL1	0.788372	0.0392947
ataxin 10	ATXN10	0.788217	0.0147231
exportin 6	XPO6	0.788109	0.021314
zinc finger with KRAB and SCAN domains 4	ZKSCAN4	0.788043	0.0191662
zinc finger protein 846	ZNF846	0.788	0.04119
small nucleolar RNA, H/ACA box 16B	SNORA16B	0.787935	0.046976
GTP binding protein 5 (putative)	GTPBP5	0.787741	0.00603378
Ras and Rab interactor 3	RIN3	0.787738	0.00916397
zinc finger protein 441	ZNF441	0.787713	0.0127528
protein phosphatase, Mg2+/Mn2+ dependent, 1F	PPM1F	0.787684	0.032538
zinc finger protein 710	ZNF710	0.78754	0.0311824
interleukin 10 receptor, alpha	IL10RA	0.787537	0.00724785
dynein, cytoplasmic 1, heavy chain 1	DYNC1H1	0.787529	0.0395585
NADH dehydrogenase (ubiquinone) 1, subcomplex unknown, 2, 14.5kDa	NDUFC2	0.7874	0.00257872
chromosome 18 open reading frame 19	C18orf19	0.787356	0.0449915
septin 1	2012-09-01	0.787167	0.023553
LIM and SH3 protein 1	LASP1	0.786804	0.0218763
thioredoxin domain containing 12 (endoplasmic reticulum)	TXNDC12	0.7868	0.0318647
nuclear pore complex interacting protein-like 3	NPIPL3	0.786628	0.0361054
unc-50 homolog (C. elegans)	UNC50	0.786573	0.00513601
osteoclast associated, immunoglobulin-like receptor	OSCAR	0.786431	0.0243039
achalasia, adrenocortical insufficiency, alacrimia	AAAS	0.786271	0.00824963
chromosome 4 open reading frame 27	C4orf27	0.786234	0.0238741
isocitrate dehydrogenase 3 (NAD+) gamma	IDH3G	0.786093	0.0107419
transmembrane protein 203	TMEM203	0.786014	0.0110969
valyl-tRNA synthetase	VARS	0.785972	0.00793536
mitochondrial ribosomal protein L46	MRPL46	0.785815	0.0125807
exosome component 2	EXOSC2	0.785709	0.0145667
dehydrogenase/reductase (SDR family) member 9	DHRS9	0.785571	0.0189878
solute carrier family 35, member A4	SLC35A4	0.785362	0.0388747
SEC16 homolog A (S. cerevisiae)	SEC16A	0.785353	0.0367588
CTTNBP2 N-terminal like	CTTNBP2NL	0.785305	0.0163406
unc-45 homolog A (C. elegans)	UNC45A	0.785194	0.00612226
KIAA1279	KIAA1279	0.785038	0.00750911
RNA binding motif protein 8A	RBM8A	0.784968	0.0180726
aryl hydrocarbon receptor nuclear translocator	ARNT	0.784923	0.0381977
PET112-like (yeast)	PET112L	0.784896	0.023553
ELAV (embryonic lethal, abnormal vision, Drosophila)-like 1 (Hu antigen R)	ELAVL1	0.78451	0.0207256
phosphoribosyl pyrophosphate synthetase-associated protein 2	PRPSAP2	0.784421	0.00775006
zinc finger protein 445	ZNF445	0.784092	0.00695973
solute carrier family 39 (zinc transporter), member 9	SLC39A9	0.784042	0.037027
phosphatidylinositol glycan anchor biosynthesis, class S	PIGS	0.784002	0.0164014
T cell receptor alpha joining 17	TRAJ17	0.783939	0.00850504
formin homology 2 domain containing 1	FHOD1	0.783926	0.00465341
neurobeachin-like 2	NBEAL2	0.783855	0.0367489
GTPase activating protein and VPS9 domains 1	GAPVD1	0.7838	0.0395215
component of oligomeric golgi complex 7	COG7	0.783302	0.00760153
CKLF-like MARVEL transmembrane domain containing 1	CMTM1	0.78296	0.0020428
SEC22 vesicle trafficking protein homolog B (S. cerevisiae) (gene/pseudogene)	SEC22B	0.782796	0.021314
mitochondrial ribosomal protein S30	MRPS30	0.782781	0.0441607
transmembrane 7 superfamily member 3	TM7SF3	0.782749	0.0333942
oligonucleotide/oligosaccharide-binding fold containing 1	OBFC1	0.782512	0.0409032
germ cell-less homolog 1 (Drosophila)	GMCL1	0.782417	0.0238741
mitochondrial rRNA methyltransferase 1 homolog (S. cerevisiae)	MRM1	0.782393	0.0275464
KIAA0319-like	KIAA0319L	0.782318	0.00868231
adaptor-related protein complex 1, beta 1 subunit	AP1B1	0.782146	0.0313929
peroxisomal biogenesis factor 3	PEX3	0.782082	0.0372562
chromosome 7 open reading frame 49	C7orf49	0.782069	0.00926556
EFR3 homolog A (S. cerevisiae)	EFR3A	0.782056	0.0466677
coiled-coil domain containing 47	CCDC47	0.782049	0.0313929
solute carrier family 5 (sodium/myo-inositol cotransporter), member 3	SLC5A3	0.781964	0.0426727
Down syndrome critical region gene 3	DSCR3	0.781953	0.00967721
SPRY domain containing 3	SPRYD3	0.781935	0.0154885
cat eye syndrome chromosome region, candidate 5	CECR5	0.781625	0.0433728
chromosome 3 open reading frame 64	C3orf64	0.781505	0.00442675
ArfGAP with coiled-coil, ankyrin repeat and PH domains 2	ACAP2	0.781149	0.0206395
G protein-coupled receptor 52	GPR52	0.781095	0.0180726
c-mer proto-oncogene tyrosine kinase	MERTK	0.780954	0.0413857
mitochondrial ribosomal protein L19	MRPL19	0.780791	0.031319
DnaJ (Hsp40) homolog, subfamily C, member 19	DNAJC19	0.780601	0.0373467
chromosome 9 open reading frame 23	C9orf23	0.780411	0.0442806
phosphodiesterase 4D interacting protein	PDE4DIP	0.78038	0.0152595
neutral sphingomyelinase (N-SMase) activation associated factor	NSMAF	0.78027	0.0335964
solute carrier family 15 (H+/peptide transporter), member 2	SLC15A2	0.780091	0.0277285
telomerase-associated protein 1	TEP1	0.780005	0.0019213
GDP dissociation inhibitor 2	GDI2	0.779991	0.00408785
huntingtin	HTT	0.779902	0.0143084
ankyrin repeat and SOCS box containing 1	ASB1	0.779857	0.00676178
transmembrane protein 223	TMEM223	0.779833	0.0194133
malic enzyme 2, NAD(+)-dependent, mitochondrial	ME2	0.779679	0.0167698
SET domain containing 3	SETD3	0.779574	0.0176652
hematological and neurological expressed 1-like	HN1L	0.779527	0.00189508
mitochondrial ribosomal protein S11	MRPS11	0.779461	0.00983064
5,10-methenyltetrahydrofolate synthetase (5-formyltetrahydrofolate cyclo-ligase)	MTHFS	0.779448	0.00531243
eukaryotic translation initiation factor 2B, subunit 1 alpha, 26kDa	EIF2B1	0.779419	0.0129407
intracisternal A particle-promoted polypeptide	IPP	0.779412	0.0328639
lysine (K)-specific demethylase 4A	KDM4A	0.778974	0.0193694
chromosome 20 open reading frame 94	C20orf94	0.778877	0.0248098
stromal cell-derived factor 2	SDF2	0.7788	0.048699
coiled-coil domain containing 53	CCDC53	0.778726	0.0178358
mediator complex subunit 16	MED16	0.778726	0.0145085
adaptor-related protein complex 2, alpha 2 subunit	AP2A2	0.778668	0.0270873
diacylglycerol kinase, zeta	DGKZ	0.778628	0.0452088
sorting nexin 33	SNX33	0.77856	0.0371049
interleukin 27 receptor, alpha	IL27RA	0.778501	0.0066482
neurofibromin 1	NF1	0.778283	0.0299531
transforming growth factor beta regulator 4	TBRG4	0.778268	0.00603212
ubiquitin specific peptidase 5 (isopeptidase T)	USP5	0.778069	0.0360314
G patch domain containing 1	GPATCH1	0.777883	0.0186428
non-SMC condensin II complex, subunit D3	NCAPD3	0.777782	0.0388943
adenosine deaminase, RNA-specific	ADAR	0.777645	0.0333467
lymphotoxin beta receptor (TNFR superfamily, member 3)	LTBR	0.777499	0.0442247
heat shock 70kDa protein 4	HSPA4	0.777444	0.0378306
partner and localizer of BRCA2	PALB2	0.777334	0.00384255
ADP-ribosylation-like factor 6 interacting protein 5	ARL6IP5	0.77724	0.00376253
mediator complex subunit 17	MED17	0.777196	0.0427177
RAB4B, member RAS oncogene family	RAB4B	0.777171	0.00875176
platelet-activating factor acetylhydrolase 1b, regulatory subunit 1 (45kDa)	PAFAH1B1	0.777041	0.0494778
protein phosphatase 2A activator, regulatory subunit 4	PPP2R4	0.776998	0.013211
FYVE, RhoGEF and PH domain containing 6	FGD6	0.776977	0.0129075
mitochondrial translational initiation factor 3	MTIF3	0.776887	0.00465828
zinc finger protein 836	ZNF836	0.776793	0.0121926
asparagine-linked glycosylation 3, alpha-1,3- mannosyltransferase homolog (S. cerevisiae)	ALG3	0.776516	0.0151192
chromosome 15 open reading frame 23	C15orf23	0.77642	0.0196228
tubulin, gamma 1	TUBG1	0.776396	0.0103121
l(3)mbt-like 2 (Drosophila)	L3MBTL2	0.776389	0.00287509
family with sequence similarity 32, member A	FAM32A	0.776298	0.0257553
NADH dehydrogenase (ubiquinone) 1 beta subcomplex, 6, 17kDa	NDUFB6	0.776192	0.00515565
PRP4 pre-mRNA processing factor 4 homolog (yeast)	PRPF4	0.776057	0.00139278
senataxin	SETX	0.775926	0.0279208
chromosome 4 open reading frame 29	C4orf29	0.775589	0.0388715
dehydrodolichyl diphosphate synthase	DHDDS	0.775436	0.0142888
DNA (cytosine-5-)-methyltransferase 1	DNMT1	0.775106	0.00613564
solute carrier family 39 (zinc transporter), member 1	SLC39A1	0.774822	0.04572
chromosome 6 open reading frame 115	C6orf115	0.774707	0.0102998
chromosome 16 open reading frame 62	C16orf62	0.774519	0.0377227
zinc finger, FYVE domain containing 1	ZFYVE1	0.774501	0.0119399
nicotinamide nucleotide transhydrogenase	NNT	0.774487	0.0163931
tubulin tyrosine ligase-like family, member 4	TTLL4	0.773949	0.00854485
ankyrin repeat domain 13 family, member D	ANKRD13D	0.773747	0.0136434
actinin, alpha 4	ACTN4	0.773707	0.00640292
mitochondrial carrier homolog 2 (C. elegans)	MTCH2	0.773697	0.0243806
Tel2 interacting protein 1 homolog (S. pombe)	TTI1	0.773693	0.00247382
spectrin, alpha, non-erythrocytic 1 (alpha-fodrin)	SPTAN1	0.773663	0.0114945
signal transducer and activator of transcription 6, interleukin-4 induced	STAT6	0.773639	0.0154493
hepatocyte growth factor (hepapoietin A; scatter factor)	HGF	0.773459	0.0158155
ATPase type 13A1	ATP13A1	0.773241	0.0276086
neurobeachin-like 1	NBEAL1	0.773214	0.0412767
zinc finger protein 174	ZNF174	0.773147	0.00597545
chromosome 12 open reading frame 11	C12orf11	0.773094	0.041199
SH3KBP1 binding protein 1	SHKBP1	0.773086	0.00746338
zinc finger CCCH-type, antiviral 1	ZC3HAV1	0.773081	0.000965827
tetratricopeptide repeat domain 1	TTC1	0.772973	0.00325043
receptor-interacting serine-threonine kinase 3	RIPK3	0.772853	0.00850504
origin recognition complex, subunit 2	ORC2	0.772738	0.0307179
melanoma antigen family D, 2	MAGED2	0.772653	0.0348364
zinc finger and SCAN domain containing 21	ZSCAN21	0.772483	0.0105363
pituitary tumor-transforming 1 interacting protein	PTTG1IP	0.77239	0.0498976
numb homolog (Drosophila)	NUMB	0.772216	0.0205596
casein kinase 2, alpha 1 polypeptide	CSNK2A1	0.772067	0.0107789
DnaJ (Hsp40) homolog, subfamily C, member 14	DNAJC14	0.772001	0.01255
YEATS domain containing 2	YEATS2	0.771996	0.0185336
nucleoporin 160kDa	NUP160	0.771964	0.0341849
trafficking protein particle complex 6B	TRAPPC6B	0.771946	0.0300538
allograft inflammatory factor 1	AIF1	0.771918	0.0229789
zinc finger protein 224	ZNF224	0.771793	0.0344189
chromosome 22 open reading frame 40	C22orf40	0.771549	0.00396733
MFNG O-fucosylpeptide 3-beta-N-acetylglucosaminyltransferase	MFNG	0.771522	0.0246861
purine-rich element binding protein A	PURA	0.771486	0.00489664
ring finger protein 213	RNF213	0.77142	0.0190335
Hermansky-Pudlak syndrome 5	HPS5	0.771372	0.0144205
proteasome (prosome, macropain) subunit, beta type, 3	PSMB3	0.771341	0.0192891
fasciculation and elongation protein zeta 2 (zygin II)	FEZ2	0.771304	0.0196653
zinc finger, MYM-type 4	ZMYM4	0.77127	0.00859419
aldehyde dehydrogenase 9 family, member A1	ALDH9A1	0.771179	0.0221136
replication protein A1, 70kDa	RPA1	0.77116	0.00171172
fukutin	FKTN	0.771146	0.00597545
chromosome 11 open reading frame 24	C11orf24	0.770942	0.0181453
general transcription factor IIA, 1, 19/37kDa	GTF2A1	0.770715	0.00531183
glutamine and serine rich 1	QSER1	0.770694	0.00967943
vasoactive intestinal peptide receptor 1	VIPR1	0.770633	0.033867
TIMP metallopeptidase inhibitor 2	TIMP2	0.770621	0.0471751
transmembrane protein 149	TMEM149	0.770555	0.0266806
apolipoprotein L, 2	APOL2	0.770123	0.001892
polymerase (RNA) III (DNA directed) polypeptide K, 12.3 kDa	POLR3K	0.770108	0.00136187
ArfGAP with GTPase domain, ankyrin repeat and PH domain 2	AGAP2	0.770001	0.00215253
BMP2 inducible kinase	BMP2K	0.769964	0.0427566
serine/arginine-rich splicing factor 1	SRSF1	0.769867	0.0235742
mediator complex subunit 24	MED24	0.769838	0.0075204
secretory carrier membrane protein 2	SCAMP2	0.769802	0.00598655
glucosidase, alpha; neutral AB	GANAB	0.769709	0.0102259
endoplasmic reticulum metallopeptidase 1	ERMP1	0.769709	0.0406126
importin 13	IPO13	0.769642	0.00257837
protein kinase-like protein SgK196	SGK196	0.76953	0.0150044
poly (ADP-ribose) polymerase family, member 12	PARP12	0.769494	0.0255466
integrin, beta 2 (complement component 3 receptor 3 and 4 subunit)	ITGB2	0.769488	0.00293874
potassium voltage-gated channel, Isk-related family, member 3	KCNE3	0.769395	0.0232578
POC5 centriolar protein homolog (Chlamydomonas)	POC5	0.769325	0.00882589
tRNA splicing endonuclease 15 homolog (S. cerevisiae)	TSEN15	0.769061	0.0219565
mitochondrial ribosomal protein L18	MRPL18	0.768865	0.027551
chromosome 10 open reading frame 26	C10orf26	0.768758	0.0099504
UBX domain protein 8	UBXN8	0.768726	0.00385626
origin recognition complex, subunit 4	ORC4	0.768698	0.0402328
G protein-coupled receptor 162	GPR162	0.768546	0.0495299
catechol-O-methyltransferase	COMT	0.768447	0.0144205
glyceronephosphate O-acyltransferase	GNPAT	0.768416	0.0248101
mannosidase, beta A, lysosomal	MANBA	0.768293	0.0367422
copine I	CPNE1	0.768259	0.0121926
Era G-protein-like 1 (E. coli)	ERAL1	0.768161	0.00756718
ring finger protein 31	RNF31	0.768136	0.00802857
WD repeat domain 70	WDR70	0.768115	0.0385498
chromosome 9 open reading frame 102	C9orf102	0.768053	0.0494144
vaccinia related kinase 3	VRK3	0.767876	0.00658929
interferon regulatory factor 5	IRF5	0.767843	0.012622
inhibitor of kappa light polypeptide gene enhancer in B-cells, kinase complex-associated protein	IKBKAP	0.767814	0.0123528
tubulin, gamma complex associated protein 4	TUBGCP4	0.767786	0.0100039
biogenesis of lysosomal organelles complex-1, subunit 1	BLOC1S1	0.767658	0.0139649
NFAT activating protein with ITAM motif 1	NFAM1	0.767589	0.0309364
histone deacetylase 2	HDAC2	0.767548	0.0314427
ERI1 exoribonuclease family member 2	ERI2	0.767533	0.0075204
Spi-B transcription factor (Spi-1/PU.1 related)	SPIB	0.767531	0.0310075
MMS22-like, DNA repair protein	MMS22L	0.767362	0.00997949
F-box protein 45	FBXO45	0.767348	0.0443939
farnesyltransferase, CAAX box, alpha	FNTA	0.76718	0.00445877
glycosyltransferase 25 domain containing 1	GLT25D1	0.767103	0.0101777
zinc finger protein 319	ZNF319	0.767055	0.0138178
chromosome 10 open reading frame 88	C10orf88	0.767038	0.0346758
negative regulator of ubiquitin-like proteins 1	NUB1	0.76696	0.0263517
dehydrogenase E1 and transketolase domain containing 1	DHTKD1	0.766796	0.0148662
angiogenic factor with G patch and FHA domains 1	AGGF1	0.766687	0.0128432
rabaptin, RAB GTPase binding effector protein 1	RABEP1	0.766653	0.025876
integrin, alpha 4 (antigen CD49D, alpha 4 subunit of VLA-4 receptor)	ITGA4	0.76658	0.0162084
heterogeneous nuclear ribonucleoprotein F	HNRNPF	0.766571	0.0189847
small nuclear ribonucleoprotein 40kDa (U5)	SNRNP40	0.766569	0.00370745
heparan-alpha-glucosaminide N-acetyltransferase	HGSNAT	0.766276	0.0428564
additional sex combs like 2 (Drosophila)	ASXL2	0.766208	0.010286
zinc finger protein 642	ZNF642	0.766186	0.00802807
coiled-coil domain containing 142	CCDC142	0.766149	0.00412152
chromosome 10 open reading frame 54	C10orf54	0.765695	0.0221064
KIAA0100	KIAA0100	0.765692	0.0387372
THO complex 2	THOC2	0.765554	0.0263291
aldehyde dehydrogenase 18 family, member A1	ALDH18A1	0.765534	0.0176652
active BCR-related gene	ABR	0.765449	0.00894666
ankyrin repeat and zinc finger domain containing 1	ANKZF1	0.76535	0.00983064
mitochondrial ribosomal protein S5	MRPS5	0.765326	0.0117533
retinoid X receptor, alpha	RXRA	0.765323	0.0204985
NODAL modulator 3	NOMO3	0.76524	0.00808048
integrin, alpha 5 (fibronectin receptor, alpha polypeptide)	ITGA5	0.765098	0.0280885
diacylglycerol O-acyltransferase 2	DGAT2	0.765085	0.000903588
membrane bound O-acyltransferase domain containing 1	MBOAT1	0.764954	0.046165
glutamic-oxaloacetic transaminase 1, soluble (aspartate aminotransferase 1)	GOT1	0.764939	0.0128611
coiled-coil domain containing 132	CCDC132	0.764911	0.0264232
threonyl-tRNA synthetase 2, mitochondrial (putative)	TARS2	0.76481	0.00437297
cornichon homolog 4 (Drosophila)	CNIH4	0.764761	0.0173869
adaptor-related protein complex 3, mu 1 subunit	AP3M1	0.764659	0.0210369
vacuolar protein sorting 11 homolog (S. cerevisiae)	VPS11	0.76465	0.0249462
nicastrin	NCSTN	0.764606	0.0123352
inhibitor of growth family, member 4	ING4	0.764467	0.00531243
BRCA1/BRCA2-containing complex, subunit 3	BRCC3	0.764307	0.0435073
N-acetylneuraminic acid synthase	NANS	0.764281	0.0128132
malate dehydrogenase 1, NAD (soluble)	MDH1	0.764164	0.0236013
exportin 5	XPO5	0.764145	0.0232308
ADP-ribosylation factor guanine nucleotide-exchange factor 1(brefeldin A-inhibited)	ARFGEF1	0.764133	0.031205
NKF3 kinase family member	PEAK1	0.764114	0.0138519
peptidylprolyl isomerase (cyclophilin)-like 1	PPIL1	0.764111	0.0075204
apolipoprotein B mRNA editing enzyme, catalytic polypeptide-like 3D	APOBEC3D	0.763986	0.0112332
nuclear transcription factor Y, beta	NFYB	0.763954	0.0202369
family with sequence similarity 105, member A	FAM105A	0.76388	0.0430661
family with sequence similarity 122A	FAM122A	0.763833	0.0176652
cell division cycle 23 homolog (S. cerevisiae)	CDC23	0.763812	0.014265
TBC1 domain family, member 10B	TBC1D10B	0.763809	0.0104272
calcium/calmodulin-dependent protein kinase kinase 2, beta	CAMKK2	0.763789	0.0204886
chromosome 1 open reading frame 162	C1orf162	0.76361	0.0408901
TAF12 RNA polymerase II, TATA box binding protein (TBP)-associated factor, 20kDa	TAF12	0.763584	0.00510054
NHL repeat containing 3	NHLRC3	0.763565	0.0427566
taste receptor, type 2, member 50	TAS2R50	0.763515	0.032748
protein phosphatase 3, catalytic subunit, beta isozyme	PPP3CB	0.763455	0.0122438
homeodomain interacting protein kinase 3	HIPK3	0.763415	0.0359423
osteoclast stimulating factor 1	OSTF1	0.763387	0.0164791
palmitoyl-protein thioesterase 1	PPT1	0.763149	0.0338826
hemochromatosis	HFE	0.7629	0.0207115
ankyrin repeat domain 17	ANKRD17	0.762739	0.0121017
spindle and kinetochore associated complex subunit 2	SKA2	0.762726	0.0151083
dCTP pyrophosphatase 1	DCTPP1	0.762724	0.00362207
transmembrane protein 214	TMEM214	0.762504	0.00223397
receptor accessory protein 4	REEP4	0.762235	0.0199198
isoleucyl-tRNA synthetase 2, mitochondrial	IARS2	0.762199	0.0137163
fatty acyl CoA reductase 2	FAR2	0.762189	0.0435654
methyltransferase like 2A	METTL2A	0.762123	0.0196015
chromosome 17 open reading frame 44	C17orf44	0.762098	0.0172946
oxysterol binding protein-like 5	OSBPL5	0.762078	0.0371412
adaptor-related protein complex 3, delta 1 subunit	AP3D1	0.761993	0.0195768
solute carrier family 43, member 3	SLC43A3	0.761915	0.0122726
calcium binding protein P22 pseudogene	LOC729603	0.76189	0.0266426
TBC1 domain family, member 2B	TBC1D2B	0.761505	0.0279802
zinc finger protein 780A	ZNF780A	0.761393	0.0254884
G protein-coupled receptor 77	GPR77	0.76134	0.0338264
tripartite motif containing 25	TRIM25	0.761183	0.0103965
zinc finger protein 41	ZNF41	0.7611	0.0184109
branched chain amino-acid transaminase 2, mitochondrial	BCAT2	0.761017	0.0122883
armadillo repeat containing 6	ARMC6	0.760974	0.00891404
nuclear receptor corepressor 1	NCOR1	0.760799	0.0208505
abhydrolase domain containing 3	ABHD3	0.760751	0.0485139
chloride channel 7	CLCN7	0.760528	0.0186428
ATPase, H+ transporting, lysosomal 9kDa, V0 subunit e1	ATP6V0E1	0.760462	0.00983064
transmembrane and coiled-coil domains 7	TMCO7	0.76029	0.00290514
secernin 1	SCRN1	0.760213	0.0265468
zinc finger protein 490	ZNF490	0.760194	0.00290514
nucleoporin 155kDa	NUP155	0.760092	0.0386356
calmodulin-like 4	CALML4	0.759461	0.0266103
molybdenum cofactor synthesis 2	MOCS2	0.759371	0.00926796
BRI3 binding protein	BRI3BP	0.759329	0.00402207
thioredoxin domain containing 15	TXNDC15	0.759235	0.00588119
dpy-30 homolog (C. elegans)	DPY30	0.759151	0.0176385
mitogen-activated protein kinase kinase kinase 11	MAP3K11	0.759111	0.0204595
zinc finger with KRAB and SCAN domains 3	ZKSCAN3	0.758888	0.0185981
clathrin, heavy chain (Hc)	CLTC	0.758778	0.010821
resistance to inhibitors of cholinesterase 8 homolog A (C. elegans)	RIC8A	0.758507	0.00608495
TRIM6-TRIM34 readthrough	TRIM6-TRIM34	0.7585	0.00232741
cathepsin B	CTSB	0.75846	0.0332131
aminoadipate-semialdehyde dehydrogenase-phosphopantetheinyl transferase	AASDHPPT	0.75844	0.0306435
exosome component 1	EXOSC1	0.758271	0.0477766
PRELI domain containing 1	PRELID1	0.758071	0.027041
transducin (beta)-like 3	TBL3	0.758071	0.00340888
polycomb group ring finger 6	PCGF6	0.757811	0.00543875
zinc finger protein 2	ZNF2	0.757796	0.0147231
ubiquitin protein ligase E3C	UBE3C	0.757607	0.0145864
S-phase kinase-associated protein 2 (p45)	SKP2	0.757577	0.0109586
CAP, adenylate cyclase-associated protein 1 (yeast)	CAP1	0.757477	0.000208197
signal transducer and activator of transcription 5A	STAT5A	0.757401	0.00785194
ARP3 actin-related protein 3 homolog (yeast)	ACTR3	0.757393	0.00239857
ring finger protein, transmembrane 1	RNFT1	0.757298	0.0280681
SET domain, bifurcated 2	SETDB2	0.757246	0.0367466
adaptor-related protein complex 2, alpha 1 subunit	AP2A1	0.757116	0.035454
Fc fragment of IgE, high affinity I, receptor for; gamma polypeptide	FCER1G	0.75702	0.0236013
apolipoprotein B mRNA editing enzyme, catalytic polypeptide-like 3F	APOBEC3F	0.756807	0.00597545
lysophospholipase II pseudogene 1	LYPLA2P1	0.756747	0.0010059
proteasome (prosome, macropain) 26S subunit, non-ATPase, 2	PSMD2	0.756733	0.010426
NADH dehydrogenase (ubiquinone) Fe-S protein 1, 75kDa (NADH-coenzyme Q reductase)	NDUFS1	0.756596	0.014664
phosphoinositide-3-kinase, catalytic, delta polypeptide	PIK3CD	0.756577	0.00387367
retinoic acid receptor responder (tazarotene induced) 3	RARRES3	0.756518	0.00180992
StAR-related lipid transfer (START) domain containing 7	STARD7	0.756411	0.0186237
programmed cell death 11	PDCD11	0.756102	0.00746338
ring finger protein 135	RNF135	0.75596	0.0109538
PRP8 pre-mRNA processing factor 8 homolog (S. cerevisiae)	PRPF8	0.755844	0.00287656
dehydrogenase/reductase (SDR family) member 1	DHRS1	0.755811	0.0102055
coiled-coil domain containing 149	CCDC149	0.755793	0.00294804
chromosome 17 open reading frame 62	C17orf62	0.755733	0.00432627
nucleolar and coiled-body phosphoprotein 1	NOLC1	0.755671	0.031319
required for meiotic nuclear division 5 homolog B (S. cerevisiae)	RMND5B	0.755619	0.0108153
family with sequence similarity 120B	FAM120B	0.755243	0.00926796
MYC induced nuclear antigen	MINA	0.755241	0.0027427
zinc finger protein 14 homolog (mouse)	ZFP14	0.75511	0.0487122
H2A histone family, member Z	H2AFZ	0.755074	0.0185358
decapping enzyme, scavenger	DCPS	0.75497	0.00685733
ubiquitin-like modifier activating enzyme 1	UBA1	0.754947	0.00908561
C1GALT1-specific chaperone 1	C1GALT1C1	0.754887	0.00555088
nucleoporin 188kDa	NUP188	0.754765	0.0029442
HD domain containing 3	HDDC3	0.75466	0.00598655
GLE1 RNA export mediator homolog (yeast)	GLE1	0.754653	0.00346534
general transcription factor IIIC, polypeptide 3, 102kDa	GTF3C3	0.754534	0.0403431
KIAA0586	KIAA0586	0.754462	0.0449344
sorting nexin 20	SNX20	0.754408	0.00363017
solute carrier family 25 (mitochondrial thiamine pyrophosphate carrier), member 19	SLC25A19	0.754238	0.0334314
chromosome 21 open reading frame 91	C21orf91	0.754163	0.0290559
capping protein (actin filament) muscle Z-line, alpha 1	CAPZA1	0.754077	0.00167635
phosphatidylinositol transfer protein, alpha	PITPNA	0.754002	0.0148646
napsin B aspartic peptidase pseudogene	NAPSB	0.75398	0.0365896
MYST histone acetyltransferase 1	MYST1	0.753769	0.014265
family with sequence similarity 111, member A	FAM111A	0.753481	0.0353144
Rho GTPase activating protein 17	ARHGAP17	0.753445	0.0199198
tripartite motif containing 68	TRIM68	0.753217	0.0119399
kelch-like ECH-associated protein 1	KEAP1	0.753139	0.00320743
zinc finger protein 850	ZNF850	0.753106	0.0303742
coiled-coil-helix-coiled-coil-helix domain containing 1	CHCHD1	0.75297	0.0180726
structural maintenance of chromosomes 1A	SMC1A	0.752968	0.0123383
GTPase activating protein (SH3 domain) binding protein 1	G3BP1	0.752941	0.00607367
phenylalanyl-tRNA synthetase, beta subunit	FARSB	0.752857	0.0137866
tweety homolog 2 (Drosophila)	TTYH2	0.752851	0.0164706
eukaryotic translation initiation factor 2, subunit 2 beta, 38kDa	EIF2S2	0.752849	0.0324317
von Hippel-Lindau binding protein 1	VBP1	0.752813	0.0151973
NADH dehydrogenase (ubiquinone) 1 alpha subcomplex, 2, 8kDa	NDUFA2	0.752701	0.0459276
Bardet-Biedl syndrome 10	BBS10	0.752518	0.0113492
solute carrier family 36 (proton/amino acid symporter), member 1	SLC36A1	0.752342	0.001892
metallo-beta-lactamase domain containing 2	MBLAC2	0.752341	0.0334421
schlafen family member 12	SLFN12	0.752094	0.0478752
chromosome 16 open reading frame 53	C16orf53	0.752049	0.00518437
MpV17 mitochondrial inner membrane protein	MPV17	0.751892	0.0176652
scavenger receptor class B, member 2	SCARB2	0.751783	0.0432089
myelin protein zero-like 1	MPZL1	0.751765	0.00347691
THO complex 3	THOC3	0.751622	0.0193921
phosphatidylinositol glycan anchor biosynthesis, class F	PIGF	0.751505	0.0160178
ankyrin repeat and IBR domain containing 1	ANKIB1	0.751482	0.0322767
Friend leukemia virus integration 1	FLI1	0.751336	0.00738971
reticulon 1	RTN1	0.751098	0.0104932
zinc finger protein 616	ZNF616	0.750866	0.0416255
ATPase, class VI, type 11A	ATP11A	0.750636	0.0306575
protein disulfide isomerase family A, member 4	PDIA4	0.750609	0.0105191
inositol polyphosphate-4-phosphatase, type I, 107kDa	INPP4A	0.750564	0.0233376
cytochrome b-245, beta polypeptide	CYBB	0.750556	0.00423559
enhancer of mRNA decapping 3 homolog (S. cerevisiae)	EDC3	0.75055	0.00651454
translocated promoter region (to activated MET oncogene)	TPR	0.750434	0.0143282
high density lipoprotein binding protein	HDLBP	0.750149	0.0129441
M-phase phosphoprotein 8	MPHOSPH8	0.750145	0.00933251
solute carrier family 24 (sodium/potassium/calcium exchanger), member 6	SLC24A6	0.750138	0.0256062
bestrophin 1	BEST1	0.750097	0.00914999
holocytochrome c synthase	HCCS	0.750051	0.00914999
ring finger protein 20	RNF20	0.749975	0.00673873
centrosomal protein 170kDa pseudogene 1	CEP170P1	0.7498	0.0219865
pigeon homolog (Drosophila)	PION	0.749625	0.0441663
solute carrier family 11 (proton-coupled divalent metal ion transporters), member 1	SLC11A1	0.749569	0.0103883
amyloid beta precursor protein (cytoplasmic tail) binding protein 2	APPBP2	0.749404	0.0385498
FtsJ homolog 2 (E. coli)	FTSJ2	0.749328	0.000928977
importin 9	IPO9	0.749185	0.00399791
origin recognition complex, subunit 3	ORC3	0.749118	0.0165879
tetraspanin 14	TSPAN14	0.74908	0.00987917
solute carrier family 25, member 44	SLC25A44	0.749018	0.0026333
serologically defined colon cancer antigen 3	SDCCAG3	0.748966	0.0188455
solute carrier family 35, member B3	SLC35B3	0.74883	0.0123352
proteasome (prosome, macropain) activator subunit 2 (PA28 beta)	PSME2	0.748751	0.0322589
ubiquitination factor E4A (UFD2 homolog, yeast)	UBE4A	0.748608	0.00789202
tripartite motif containing 21	TRIM21	0.748295	0.0296524
protein kinase C, delta	PRKCD	0.748226	0.00852119
adaptor-related protein complex 1, mu 1 subunit	AP1M1	0.748163	0.00757852
haloacid dehalogenase-like hydrolase domain containing 1	HDHD1	0.748067	0.0132526
RCSD domain containing 1	RCSD1	0.747991	0.00402631
family with sequence similarity 178, member A	FAM178A	0.74776	0.00412767
ADP-ribosylation factor-like 2	ARL2	0.74773	0.00228843
transcription elongation factor A (SII) N-terminal and central domain containing 2	TCEANC2	0.747686	0.00555088
histidyl-tRNA synthetase	HARS	0.747407	0.0170114
small nuclear ribonucleoprotein 200kDa (U5)	SNRNP200	0.747216	0.00214757
leucine rich repeat containing 8 family, member D	LRRC8D	0.747213	0.0102055
deoxycytidine kinase	DCK	0.747197	0.0406807
zinc finger protein 438	ZNF438	0.747153	0.00135809
RWD domain containing 2B	RWDD2B	0.747129	0.0218915
aminopeptidase puromycin sensitive	NPEPPS	0.746993	0.024388
butyrophilin, subfamily 3, member A3	BTN3A3	0.746981	0.0321078
CCR4-NOT transcription complex, subunit 6	CNOT6	0.746977	0.0345061
peroxiredoxin 4	PRDX4	0.746939	0.00756718
paxillin	PXN	0.746886	0.0108195
integrin, beta 7	ITGB7	0.746782	0.00593691
THO complex 6 homolog (Drosophila)	THOC6	0.746767	0.00863885
HEAT repeat containing 3	HEATR3	0.746646	0.0243578
COX10 homolog, cytochrome c oxidase assembly protein, heme A: farnesyltransferase (yeast)	COX10	0.746632	0.00826814
DNA cross-link repair 1A	DCLRE1A	0.746567	0.00501228
protein phosphatase methylesterase 1	PPME1	0.74622	0.00156248
apolipoprotein B mRNA editing enzyme, catalytic polypeptide-like 3C	APOBEC3C	0.746207	0.0125467
integrator complex subunit 9	INTS9	0.746161	0.00200238
family with sequence similarity 173, member B	FAM173B	0.7461	0.0226438
polymerase (RNA) II (DNA directed) polypeptide H	POLR2H	0.746078	0.00598655
adaptor-related protein complex 4, epsilon 1 subunit	AP4E1	0.745994	0.00843882
serine palmitoyltransferase, long chain base subunit 1	SPTLC1	0.745822	0.00849558
high-mobility group 20A	HMG20A	0.745813	0.01079
tRNA methyltransferase 11-2 homolog (S. cerevisiae)	TRMT112	0.745717	0.024551
leucyl/cystinyl aminopeptidase	LNPEP	0.745703	0.0145099
synaptojanin 1	SYNJ1	0.745687	0.0290846
NADH dehydrogenase (ubiquinone) 1 beta subcomplex, 5, 16kDa	NDUFB5	0.745628	0.0474953
FtsJ methyltransferase domain containing 1	FTSJD1	0.745595	0.000868887
SLIT-ROBO Rho GTPase activating protein 2	SRGAP2	0.745256	0.00290514
dicarbonyl/L-xylulose reductase	DCXR	0.745214	0.00547226
small ArfGAP2	SMAP2	0.74517	0.00600844
cytochrome b-561 domain containing 2	CYB561D2	0.745153	0.0100166
thioredoxin-related transmembrane protein 1	TMX1	0.745122	0.0344018
CDP-diacylglycerol--inositol 3-phosphatidyltransferase	CDIPT	0.744989	0.0178234
cystinosis, nephropathic	CTNS	0.744971	0.00966446
solute carrier family 46, member 3	SLC46A3	0.744954	0.0173453
CENPB DNA-binding domains containing 1	CENPBD1	0.744931	0.00648615
protein kinase, cAMP-dependent, catalytic, beta	PRKACB	0.744801	0.0164352
NOP10 ribonucleoprotein homolog (yeast)	NOP10	0.744471	0.0214213
glucosaminyl (N-acetyl) transferase 2, I-branching enzyme (I blood group)	GCNT2	0.744409	0.0312444
WD repeat domain 3	WDR3	0.744403	0.0231859
ras-related C3 botulinum toxin substrate 2 (rho family, small GTP binding protein Rac2)	RAC2	0.744075	0.00036914
LIM domains containing 1	LIMD1	0.7439	0.00444302
ecto-NOX disulfide-thiol exchanger 2	ENOX2	0.743896	0.00930372
aminoadipate-semialdehyde dehydrogenase	AASDH	0.743771	0.0329904
ubiquinol-cytochrome c reductase, complex III subunit X	UQCR10	0.743683	0.00491752
transmembrane protein 204	TMEM204	0.743468	0.0286475
nucleotide binding protein 1 (MinD homolog, E. coli)	NUBP1	0.743436	0.0113846
arginyl aminopeptidase (aminopeptidase B)	RNPEP	0.743264	0.00778872
family with sequence similarity 134, member C	FAM134C	0.743254	0.00211852
WD repeat domain 7	WDR7	0.743091	0.0195715
insulin-like growth factor 2 receptor	IGF2R	0.743081	0.025609
bystin-like	BYSL	0.742866	0.0070185
myosin IE	MYO1E	0.742781	0.00850504
zinc finger protein 322A	ZNF322A	0.742735	0.00599434
alkaline ceramidase 3	ACER3	0.74269	0.0428564
DEAH (Asp-Glu-Ala-His) box polypeptide 16	DHX16	0.742612	0.00349698
Leo1, Paf1/RNA polymerase II complex component, homolog (S. cerevisiae)	LEO1	0.742541	0.00580248
UDP-glucose 6-dehydrogenase	UGDH	0.742392	0.0400226
nitrogen permease regulator-like 2 (S. cerevisiae)	NPRL2	0.7422	0.00785608
GTP-binding protein 10 (putative)	GTPBP10	0.742171	0.0153673
cysteine-serine-rich nuclear protein 2	CSRNP2	0.742067	0.0059775
MON2 homolog (S. cerevisiae)	MON2	0.742054	0.0100561
myosin IF	MYO1F	0.741732	0.00531183
eyes absent homolog 3 (Drosophila)	EYA3	0.741624	0.00639562
lectin, galactoside-binding, soluble, 9B	LGALS9B	0.74161	0.0075204
calcium binding atopy-related autoantigen 1	CBARA1	0.741607	0.0186428
proteasomal ATPase-associated factor 1	PAAF1	0.741571	0.0272352
phosphatase and actin regulator 4	PHACTR4	0.741515	0.0259348
transmembrane protein 19	TMEM19	0.741458	0.0101109
SWI/SNF related, matrix associated, actin dependent regulator of chromatin, subfamily a-like 1	SMARCAL1	0.741433	0.00114437
thromboxane A synthase 1 (platelet)	TBXAS1	0.741309	0.0316289
alkB, alkylation repair homolog 1 (E. coli)	ALKBH1	0.741232	0.00625167
zinc finger protein 253	ZNF253	0.741056	0.0433682
transducin (beta)-like 1X-linked	TBL1X	0.740875	0.0150044
prohibitin	PHB	0.740823	0.0324134
solute carrier family 30 (zinc transporter), member 5	SLC30A5	0.740804	0.0140714
receptor (TNFRSF)-interacting serine-threonine kinase 1	RIPK1	0.740776	0.0144439
solute carrier family 9 (sodium/hydrogen exchanger), member 6	SLC9A6	0.740772	0.0141133
acyl-CoA thioesterase 13	ACOT13	0.740711	0.0196798
sialic acid binding Ig-like lectin 10	SIGLEC10	0.740706	0.0488694
protein tyrosine phosphatase, receptor type, C	PTPRC	0.740498	0.00593339
thyroid hormone receptor interactor 12	TRIP12	0.740457	0.00916397
ASF1 anti-silencing function 1 homolog B (S. cerevisiae)	ASF1B	0.740029	0.00454784
coiled-coil domain containing 21	CCDC21	0.739985	0.00112787
PQ loop repeat containing 3	PQLC3	0.739946	0.0118684
zinc finger protein 607	ZNF607	0.739712	0.0181867
tubulin, delta 1	TUBD1	0.739635	0.0119018
chaperonin containing TCP1, subunit 7 (eta)	CCT7	0.73961	0.0025475
hydroxysteroid dehydrogenase like 2	HSDL2	0.739446	0.013454
selectin L	SELL	0.739357	0.00290514
RNA binding motif protein 8A	RBM8A	0.739335	0.0115712
lymphocyte-specific protein tyrosine kinase	LCK	0.73924	0.00636924
F-box protein 22	FBXO22	0.739237	0.000294006
methylmalonyl CoA mutase	MUT	0.738952	0.0121162
COMM domain containing 8	COMMD8	0.738844	0.0262792
CD300 molecule-like family member b	CD300LB	0.738643	0.0110997
zinc finger protein 701	ZNF701	0.738342	0.0410585
asparagine-linked glycosylation 8, alpha-1,3-glucosyltransferase homolog (S. cerevisiae)	ALG8	0.7382	0.00259539
zinc finger, MYM-type 1	ZMYM1	0.738168	0.0135517
cleavage stimulation factor, 3' pre-RNA, subunit 3, 77kDa	CSTF3	0.738159	0.0180281
transmembrane and coiled-coil domains 1	TMCO1	0.737973	0.0255987
solute carrier family 35, member C1	SLC35C1	0.737957	0.00785608
COP9 constitutive photomorphogenic homolog subunit 7A (Arabidopsis)	COPS7A	0.737913	0.00290514
PHD finger protein 6	PHF6	0.737896	0.0105318
metastasis associated 1 family, member 2	MTA2	0.737806	0.00196914
WD repeat domain 6	WDR6	0.737796	0.013849
leukocyte immunoglobulin-like receptor, subfamily A (with TM domain), member 6	LILRA6	0.73776	0.00487368
serine hydroxymethyltransferase 1 (soluble)	SHMT1	0.737665	0.00390964
mitochondrial ribosomal protein L15	MRPL15	0.737647	0.0102309
family with sequence similarity 192, member A	FAM192A	0.737503	0.0253844
zinc finger protein 641	ZNF641	0.737221	0.0108478
peroxisomal D3,D2-enoyl-CoA isomerase	PECI	0.737208	0.0066482
coiled-coil domain containing 76	CCDC76	0.736992	0.0145643
microsomal glutathione S-transferase 3	MGST3	0.736889	0.00243661
zinc metallopeptidase (STE24 homolog, S. cerevisiae)	ZMPSTE24	0.736837	0.0298619
phosphatidylcholine transfer protein	PCTP	0.73676	0.0168402
transmembrane 9 superfamily protein member 4	TM9SF4	0.736545	0.0110969
chaperonin containing TCP1, subunit 4 (delta)	CCT4	0.736534	0.00635597
taxilin alpha	TXLNA	0.73627	0.00150444
2-oxoglutarate and iron-dependent oxygenase domain containing 1	OGFOD1	0.736191	0.00531183
ubiquitin specific peptidase 37	USP37	0.736087	0.0134014
suppressor of variegation 4-20 homolog 1 (Drosophila)	SUV420H1	0.736062	0.00507826
NIMA (never in mitosis gene a)- related kinase 9	NEK9	0.736005	0.0125856
branched chain ketoacid dehydrogenase kinase	BCKDK	0.736001	0.0384956
nonhomologous end-joining factor 1	NHEJ1	0.735962	0.00659447
transcription factor 25 (basic helix-loop-helix)	TCF25	0.735717	0.00349698
Rho guanine nucleotide exchange factor (GEF) 11	ARHGEF11	0.735663	0.00669273
speckle-type POZ protein	SPOP	0.735648	0.00697767
ERGIC and golgi 2	ERGIC2	0.735447	0.0096963
transmembrane protein 165	TMEM165	0.735187	0.009116
high mobility group nucleosomal binding domain 4	HMGN4	0.735176	0.000348619
phosphoglycerate mutase family member 4	PGAM4	0.735168	0.0037111
kinase D-interacting substrate, 220kDa	KIDINS220	0.735138	0.0164841
WD repeat domain 12	WDR12	0.735136	0.00465341
tripartite motif containing 14	TRIM14	0.735135	0.00963131
DIS3 mitotic control homolog (S. cerevisiae)-like	DIS3L	0.735098	0.00179514
choroideremia (Rab escort protein 1)	CHM	0.735061	0.00287656
zinc finger CCCH-type containing 14	ZC3H14	0.734926	0.00423201
replication factor C (activator 1) 2, 40kDa	RFC2	0.734895	0.00269236
chromosome 11 open reading frame 73	C11orf73	0.734863	0.00365096
chaperonin containing TCP1, subunit 6A (zeta 1)	CCT6A	0.734702	0.0239997
5-aminoimidazole-4-carboxamide ribonucleotide formyltransferase/IMP cyclohydrolase	ATIC	0.734534	0.0188455
inhibitor of kappa light polypeptide gene enhancer in B-cells, kinase epsilon	IKBKE	0.734452	0.00983064
S1 RNA binding domain 1	SRBD1	0.734147	0.0165409
osteopetrosis associated transmembrane protein 1	OSTM1	0.734118	0.0178955
mitochondrial ribosomal protein L35	MRPL35	0.734115	0.00388452
KRI1 homolog (S. cerevisiae)	KRI1	0.734075	0.0282223
zinc finger protein 140	ZNF140	0.734061	0.0408149
cyclin D2	CCND2	0.733961	0.00346127
acyl-CoA oxidase 3, pristanoyl	ACOX3	0.733868	0.00270823
poly(A) polymerase gamma	PAPOLG	0.733605	0.0138243
transmembrane 9 superfamily member 2	TM9SF2	0.733531	0.0121926
platelet/endothelial cell adhesion molecule	PECAM1	0.733484	0.0201544
Fas apoptotic inhibitory molecule 3	FAIM3	0.733412	0.0124508
hydroxyacyl-CoA dehydrogenase/3-ketoacyl-CoA thiolase/enoyl-CoA hydratase (trifunctional protein), beta subunit	HADHB	0.733067	0.0342994
c-src tyrosine kinase	CSK	0.733053	0.000286935
TBC1 domain containing kinase	TBCK	0.732943	0.0177784
zinc finger and SCAN domain containing 29	ZSCAN29	0.732771	0.0127824
sialic acid binding Ig-like lectin 16 (gene/pseudogene)	SIGLEC16	0.732621	0.0321078
zinc finger protein 75D	ZNF75D	0.732593	0.0207256
C-type lectin domain family 4, member A	CLEC4A	0.732133	0.0336547
chromosome X open reading frame 23	CXorf23	0.732133	0.0172095
G protein-coupled receptor kinase interacting ArfGAP 2	GIT2	0.731899	0.00679668
chromosome 14 open reading frame 159	C14orf159	0.731838	0.00291837
solute carrier family 38, member 10	SLC38A10	0.731811	0.0093702
AVL9 homolog (S. cerevisiase)	AVL9	0.731805	0.00219434
glutathione reductase	GSR	0.731652	0.0112114
uracil-DNA glycosylase	UNG	0.731622	0.00150444
postmeiotic segregation increased 2 pseudogene 5	PMS2P5	0.731589	0.0277285
chromosome 5 open reading frame 22	C5orf22	0.731519	0.00576794
solute carrier family 25 (mitochondrial carrier, Aralar), member 12	SLC25A12	0.731472	0.00811285
Dexi homolog (mouse)	DEXI	0.731238	0.0371551
solute carrier family 4 (anion exchanger), member 1, adaptor protein	SLC4A1AP	0.731167	0.0185417
testis derived transcript (3 LIM domains)	TES	0.731138	0.000761251
SEC24 family, member D (S. cerevisiae)	SEC24D	0.730981	0.00119104
hydroxysteroid (17-beta) dehydrogenase 12	HSD17B12	0.730845	0.0455603
chromosome 3 open reading frame 63	C3orf63	0.730821	0.0167182
solute carrier family 38, member 9	SLC38A9	0.730747	0.00778872
dedicator of cytokinesis 11	DOCK11	0.730457	0.00846738
TXK tyrosine kinase	TXK	0.730414	0.0486895
proteasome (prosome, macropain) 26S subunit, non-ATPase, 13	PSMD13	0.730386	0.012634
EF-hand calcium binding domain 4B	EFCAB4B	0.730175	0.0421953
integrator complex subunit 3	INTS3	0.729908	0.00561494
Cas-Br-M (murine) ecotropic retroviral transforming sequence	CBL	0.72979	0.0228886
schlafen family member 5	SLFN5	0.729781	0.00621976
phospholipase C, gamma 2 (phosphatidylinositol-specific)	PLCG2	0.729701	0.0182658
transmembrane BAX inhibitor motif containing 4	TMBIM4	0.729546	0.00952152
RAB7, member RAS oncogene family-like 1	RAB7L1	0.729495	0.00244195
protein kinase, cAMP-dependent, regulatory, type I, alpha (tissue specific extinguisher 1)	PRKAR1A	0.729462	0.00614875
adenylate cyclase 7	ADCY7	0.729368	0.00590216
nucleoporin 205kDa	NUP205	0.729309	0.0135022
neutral cholesterol ester hydrolase 1	NCEH1	0.729251	0.00824963
aconitase 1, soluble	ACO1	0.729236	0.00228634
tetratricopeptide repeat domain 37	TTC37	0.729227	0.0149163
catenin (cadherin-associated protein), alpha 1, 102kDa	CTNNA1	0.729212	0.0176652
caspase 2, apoptosis-related cysteine peptidase	CASP2	0.729041	0.000896293
GTPase, IMAP family member 2	GIMAP2	0.728597	0.0361412
farnesyltransferase, CAAX box, beta	FNTB	0.72854	0.0384956
chromosome 12 open reading frame 35	C12orf35	0.728536	0.0280954
eukaryotic translation initiation factor 6	EIF6	0.728479	0.00555088
dipeptidyl-peptidase 8	DPP8	0.728437	0.0276794
catenin (cadherin-associated protein), delta 1	CTNND1	0.728104	0.00609879
Rho GTPase activating protein 27	ARHGAP27	0.728051	0.00207871
EBNA1 binding protein 2	EBNA1BP2	0.727821	0.00198305
AHA1, activator of heat shock 90kDa protein ATPase homolog 1 (yeast)	AHSA1	0.727565	0.00336274
protection of telomeres 1 homolog (S. pombe)	POT1	0.727548	0.0115047
zinc finger protein 585B	ZNF585B	0.72744	0.0198673
interleukin 2 receptor, beta	IL2RB	0.727291	0.0304477
zinc finger protein 638	ZNF638	0.727231	0.0149007
eukaryotic translation initiation factor 2B, subunit 3 gamma, 58kDa	EIF2B3	0.727228	0.00425219
Ras association (RalGDS/AF-6) domain family member 4	RASSF4	0.726789	0.0288287
flightless I homolog (Drosophila)	FLII	0.726777	0.0319061
zinc finger protein 137, pseudogene	ZNF137P	0.726765	0.00669127
ralA binding protein 1	RALBP1	0.726449	0.043853
coenzyme Q5 homolog, methyltransferase (S. cerevisiae)	COQ5	0.726394	0.00287656
interferon (alpha, beta and omega) receptor 2	IFNAR2	0.726334	0.0374349
RAS protein activator like 3	RASAL3	0.726273	0.00656542
protein phosphatase 1, catalytic subunit, alpha isozyme	PPP1CA	0.725912	0.00181592
slingshot homolog 2 (Drosophila)	SSH2	0.725879	0.00291837
cytoskeleton associated protein 5	CKAP5	0.725513	0.0052015
cytokine inducible SH2-containing protein	CISH	0.725432	0.00904229
calcium binding protein 39	CAB39	0.724935	0.0173869
JNK1/MAPK8-associated membrane protein	JKAMP	0.724839	0.0175292
solute carrier family 27 (fatty acid transporter), member 3	SLC27A3	0.72476	0.0167064
ras homolog gene family, member T1	RHOT1	0.7247	0.0149007
NAD(P) dependent steroid dehydrogenase-like	NSDHL	0.724664	0.00320264
3-hydroxyisobutyryl-CoA hydrolase	HIBCH	0.724539	0.0346465
TBC1 domain family, member 14	TBC1D14	0.72428	0.00706606
chromosome 9 open reading frame 85	C9orf85	0.724217	0.0122743
amyloid beta (A4) precursor protein-binding, family B, member 1 interacting protein	APBB1IP	0.72417	0.0110997
dynein, light chain, LC8-type 1	DYNLL1	0.724077	0.00460225
CD4 molecule	CD4	0.723981	0.00257872
inositol polyphosphate-5-phosphatase, 145kDa	INPP5D	0.72395	0.000173574
T cell immunoreceptor with Ig and ITIM domains	TIGIT	0.723763	0.00582754
proteasome (prosome, macropain) subunit, beta type, 9 (large multifunctional peptidase 2)	PSMB9	0.723365	0.0037111
chromosome 3 open reading frame 23	C3orf23	0.723143	0.00586938
zinc finger CCCH-type containing 13	ZC3H13	0.723015	0.0204595
MRE11 meiotic recombination 11 homolog A (S. cerevisiae)	MRE11A	0.722944	0.0281836
sialic acid binding Ig-like lectin 7	SIGLEC7	0.722932	0.00120823
isoleucyl-tRNA synthetase	IARS	0.722832	0.0029625
HECT domain containing 3	HECTD3	0.722633	0.000612239
pyruvate dehydrogenase (lipoamide) alpha 1	PDHA1	0.722632	0.0195768
potassium voltage-gated channel, shaker-related subfamily, beta member 2	KCNAB2	0.722552	0.0107789
coiled-coil domain containing 127	CCDC127	0.722501	0.00419603
tectonic family member 3	TCTN3	0.722299	0.00543851
LIM domain and actin binding 1	LIMA1	0.72213	0.0184799
regulator of G-protein signaling 14	RGS14	0.721988	0.00120823
chromosome 21 open reading frame 33	C21orf33	0.721932	0.00659447
FYVE, RhoGEF and PH domain containing 2	FGD2	0.721741	0.0154028
APEX nuclease (apurinic/apyrimidinic endonuclease) 2	APEX2	0.721736	0.000191516
coenzyme Q9 homolog (S. cerevisiae)	COQ9	0.721641	0.00206411
oxidation resistance 1	OXR1	0.721512	0.0397668
vacuole membrane protein 1	VMP1	0.721062	0.00408785
MRS2 magnesium homeostasis factor homolog (S. cerevisiae)	MRS2	0.720749	0.00482035
chromosome 14 open reading frame 101	C14orf101	0.720666	0.00423559
ATP citrate lyase	ACLY	0.720611	0.00438258
ubiquitin specific peptidase 11	USP11	0.720606	0.000930396
glutamic-oxaloacetic transaminase 2, mitochondrial (aspartate aminotransferase 2)	GOT2	0.720565	0.0104313
D4, zinc and double PHD fingers family 2	DPF2	0.720514	0.00513601
UDP-N-acetyl-alpha-D-galactosamine:polypeptide N-acetylgalactosaminyltransferase 7 (GalNAc-T7)	GALNT7	0.720408	0.0152974
methylenetetrahydrofolate dehydrogenase (NADP+ dependent) 1, methenyltetrahydrofolate cyclohydrolase, formyltetrahydrofolate synthetase	MTHFD1	0.720404	0.00124888
zinc finger, CCHC domain containing 6	ZCCHC6	0.720205	0.0184737
versican	VCAN	0.72008	0.044534
zinc finger protein 512	ZNF512	0.719972	0.00553445
ribosomal protein L7-like 1	RPL7L1	0.719835	0.0322631
Ras association (RalGDS/AF-6) domain family member 2	RASSF2	0.719781	0.00510054
IWS1 homolog (S. cerevisiae)	IWS1	0.71964	0.00625167
leukocyte immunoglobulin-like receptor, subfamily A (with TM domain), member 6	LILRA6	0.719485	0.0182624
integral membrane protein 2C	ITM2C	0.719384	0.0410585
zinc finger protein 143	ZNF143	0.718843	0.0299487
neurocalcin delta	NCALD	0.718798	0.00625167
leucyl-tRNA synthetase	LARS	0.718555	0.0143545
alpha-kinase 1	ALPK1	0.718512	0.00738971
notch 1	NOTCH1	0.718441	0.0092707
eukaryotic translation initiation factor 3, subunit B	EIF3B	0.718274	0.00815534
thymopoietin	TMPO	0.71823	0.00592482
O-sialoglycoprotein endopeptidase-like 1	OSGEPL1	0.718204	0.00366305
signal recognition particle 54kDa	SRP54	0.718116	0.0266806
Dmx-like 1	DMXL1	0.717952	0.0355027
kelch domain containing 3	KLHDC3	0.717946	0.00905735
general transcription factor IIi	GTF2I	0.717909	0.0173869
TBC1 domain family, member 2	TBC1D2	0.717895	0.0146
N-acylaminoacyl-peptide hydrolase	APEH	0.717802	0.00262443
chromosome 20 open reading frame 177	C20orf177	0.71765	0.0262579
processing of precursor 5, ribonuclease P/MRP subunit (S. cerevisiae)	POP5	0.717584	0.037375
mannosyl (alpha-1,3-)-glycoprotein beta-1,2-N-acetylglucosaminyltransferase	MGAT1	0.717579	0.0122366
asparagine-linked glycosylation 1, beta-1,4-mannosyltransferase homolog (S. cerevisiae)	ALG1	0.717508	0.00248067
prohibitin pseudogene	LOC494150	0.717428	0.00541969
succinate-CoA ligase, ADP-forming, beta subunit	SUCLA2	0.717275	0.00238423
transmembrane protein 33	TMEM33	0.717247	0.00435215
SWI/SNF-related, matrix-associated actin-dependent regulator of chromatin, subfamily a, containing DEAD/H box 1	SMARCAD1	0.717061	0.0232029
aldehyde dehydrogenase 3 family, member A2	ALDH3A2	0.716943	0.00239801
acid phosphatase 2, lysosomal	ACP2	0.716903	0.00152677
general transcription factor IIH, polypeptide 3, 34kDa	GTF2H3	0.716891	0.0159003
DEAD (Asp-Glu-Ala-Asp) box polypeptide 46	DDX46	0.716682	0.0019213
annexin A6	ANXA6	0.716667	0.00167984
acyl-CoA synthetase long-chain family member 5	ACSL5	0.716614	0.00109373
docking protein 1, 62kDa (downstream of tyrosine kinase 1)	DOK1	0.71645	0.00136655
zinc finger protein 175	ZNF175	0.71621	0.0277285
SR-related CTD-associated factor 11	SCAF11	0.716173	0.0221596
chromosome 4 open reading frame 34	C4orf34	0.716155	0.00107794
suppressor of Ty 16 homolog (S. cerevisiae)	SUPT16H	0.716104	0.024184
solute carrier family 7 (cationic amino acid transporter, y+ system), member 7	SLC7A7	0.71595	0.0372822
glycerol kinase	GK	0.715824	0.0185862
CD86 molecule	CD86	0.715722	0.0447642
polybromo 1	PBRM1	0.715697	0.0157684
deoxynucleotidyltransferase, terminal, interacting protein 1	DNTTIP1	0.71569	0.00158498
serine hydroxymethyltransferase 2 (mitochondrial)	SHMT2	0.715413	0.0028558
tensin 3	TNS3	0.715395	0.0127653
ubiquitin-conjugating enzyme E2L 3	UBE2L3	0.715384	0.0123546
sorting and assembly machinery component 50 homolog (S. cerevisiae)	SAMM50	0.715252	0.0033205
WD repeat domain 61	WDR61	0.71522	0.00750911
diacylglycerol lipase, beta	DAGLB	0.71496	0.0121866
SAC1 suppressor of actin mutations 1-like (yeast)	SACM1L	0.714923	0.0115739
ELL associated factor 2	EAF2	0.714917	0.00926556
STT3, subunit of the oligosaccharyltransferase complex, homolog A (S. cerevisiae)	STT3A	0.714777	0.00303315
G protein-coupled receptor 180	GPR180	0.714774	0.00858146
coatomer protein complex, subunit gamma	COPG	0.714632	0.00189508
CDGSH iron sulfur domain 1	CISD1	0.714546	0.00229685
sortilin 1	SORT1	0.714527	0.0136961
insulin induced gene 2	INSIG2	0.7145	0.0122743
Vps20-associated 1 homolog (S. cerevisiae)	VTA1	0.714486	0.0254359
activating signal cointegrator 1 complex subunit 1	ASCC1	0.71426	0.00233063
lectin, mannose-binding 2-like	LMAN2L	0.714068	0.0101941
succinate-CoA ligase, alpha subunit	SUCLG1	0.713935	0.0151192
tryptophanyl-tRNA synthetase	WARS	0.713834	0.0385498
mitochondrial ribosomal protein L16	MRPL16	0.713798	0.00467015
granzyme A (granzyme 1, cytotoxic T-lymphocyte-associated serine esterase 3)	GZMA	0.713786	0.0243495
chromosome 2 open reading frame 44	C2orf44	0.713525	0.0204985
cyclin-dependent kinase 5	CDK5	0.713344	0.0117564
methyltransferase like 2B	METTL2B	0.713275	0.000652804
tetratricopeptide repeat domain 38	TTC38	0.713172	0.00819753
arachidonate 5-lipoxygenase	ALOX5	0.713169	0.0123352
exosome component 5	EXOSC5	0.713142	0.00123492
ST6 beta-galactosamide alpha-2,6-sialyltranferase 1	ST6GAL1	0.713094	0.00385626
NIMA (never in mitosis gene a)-related kinase 6	NEK6	0.713023	0.0221361
mannose-P-dolichol utilization defect 1	MPDU1	0.712831	0.00915666
cytoplasmic FMR1 interacting protein 1	CYFIP1	0.71274	0.00363017
non-metastatic cells 6, protein expressed in (nucleoside-diphosphate kinase)	NME6	0.712732	0.0201993
abhydrolase domain containing 6	ABHD6	0.712616	0.000817229
schlafen family member 11	SLFN11	0.712344	0.0174771
crystallin, zeta (quinone reductase)	CRYZ	0.712138	0.0399637
leucine-rich PPR-motif containing	LRPPRC	0.711714	0.0256331
programmed cell death 6 interacting protein	PDCD6IP	0.711711	0.000868887
RAP2A, member of RAS oncogene family	RAP2A	0.711683	0.0435981
[truncated: 735 more rows]
