# Supplementary material for: Gene Expression Profiles in Peripheral Blood Mononuclear Cells of Chinese Nickel Refinery Workers with High Exposures to Nickel and Control Subjects
Source: Oxford University Press journal article supplement (doi:10.1158/1055-9965.epi-12-1011), 2012-11-29
Supplement: 10559965epi121011-sup-tab2.xlsx [file 10559965epi121011-sup-tab2.xlsx]

## Sheet: Sheet1
Gene Name	Gene Symbol
methionine adenosyltransferase II, alpha	MAT2A
DEAD (Asp-Glu-Ala-Asp) box polypeptide 21	DDX21
structural maintenance of chromosomes 1A	SMC1A
DEAD (Asp-Glu-Ala-Asp) box polypeptide 18	DDX18
nucleolar and coiled-body phosphoprotein 1	NOLC1
serine hydroxymethyltransferase 2 (mitochondrial)	SHMT2
uracil-DNA glycosylase	UNG
lamin B1	LMNB1
TAF5 RNA polymerase II, TATA box binding protein (TBP)-associated factor, 100kDa	TAF5
polymerase (RNA) II (DNA directed) polypeptide H	POLR2H
adenylate kinase 2	AK2
solute carrier family 7 (cationic amino acid transporter, y+ system), member 5	SLC7A5
splicing factor 3a, subunit 3, 60kDa	SF3A3
ubiquitin-conjugating enzyme E2L 3	UBE2L3
nucleoporin 205kDa	NUP205
glutamyl-prolyl-tRNA synthetase	EPRS
nucleoporin 160kDa	NUP160
interferon, gamma	IFNG
BTG family, member 3	BTG3
polymerase (RNA) I polypeptide B, 128kDa	POLR1B
intercellular adhesion molecule 1	ICAM1
coiled-coil domain containing 59	CCDC59
nucleoporin 43kDa	NUP43
triosephosphate isomerase 1	TPI1
fasciculation and elongation protein zeta 2 (zygin II)	FEZ2
caldesmon 1	CALD1
transmembrane 7 superfamily member 3	TM7SF3
guanylate binding protein 1, interferon-inducible	GBP1
laminin, alpha 4	LAMA4
fibrillin 1	FBN1
immunoglobulin superfamily, member 6	IGSF6
mutS homolog 2, colon cancer, nonpolyposis type 1 (E. coli)	MSH2
phosphoribosylaminoimidazole carboxylase, phosphoribosylaminoimidazole succinocarboxamide synthetase	PAICS
proliferating cell nuclear antigen	PCNA
retinoblastoma binding protein 4	RBBP4
S-phase kinase-associated protein 2 (p45)	SKP2
interleukin enhancer binding factor 2, 45kDa	ILF2
proteasome (prosome, macropain) subunit, alpha type, 4	PSMA4
adenylosuccinate lyase	ADSL
chaperonin containing TCP1, subunit 4 (delta)	CCT4
protein kinase, DNA-activated, catalytic polypeptide	PRKDC
carbamoyl-phosphate synthetase 2, aspartate transcarbamylase, and dihydroorotase	CAD
RecQ protein-like (DNA helicase Q1-like)	RECQL
H2A histone family, member Z	H2AFZ
neuroblastoma RAS viral (v-ras) oncogene homolog	NRAS
structural maintenance of chromosomes 2	SMC2
ribonuclease H1	RNASEH1
suppressor of var1, 3-like 1 (S. cerevisiae)	SUPV3L1
thymopoietin	TMPO
pinin, desmosome associated protein	PNN
polymerase (RNA) II (DNA directed) polypeptide B, 140kDa	POLR2B
exportin 1 (CRM1 homolog, yeast)	XPO1
nuclear transcription factor Y, beta	NFYB
inner membrane protein, mitochondrial	IMMT
5-aminoimidazole-4-carboxamide ribonucleotide formyltransferase/IMP cyclohydrolase	ATIC
ELAV (embryonic lethal, abnormal vision, Drosophila)-like 1 (Hu antigen R)	ELAVL1
UDP-N-acetyl-alpha-D-galactosamine:polypeptide N-acetylgalactosaminyltransferase 2 (GalNAc-T2)	GALNT2
aurora kinase A	AURKA
malic enzyme 2, NAD(+)-dependent, mitochondrial	ME2
zinc finger and BTB domain containing 24	ZBTB24
chromatin assembly factor 1, subunit A (p150)	CHAF1A
enhancer of zeste homolog 2 (Drosophila)	EZH2
protection of telomeres 1 homolog (S. pombe)	POT1
enolase 1, (alpha)	ENO1
minichromosome maintenance complex component 3	MCM3
TNF receptor-associated protein 1	TRAP1
pyruvate dehydrogenase (lipoamide) alpha 1	PDHA1
isoleucyl-tRNA synthetase	IARS
eukaryotic translation initiation factor 2, subunit 2 beta, 38kDa	EIF2S2
X-ray repair complementing defective repair in Chinese hamster cells 5 (double-strand-break rejoining)	XRCC5
chaperonin containing TCP1, subunit 3 (gamma)	CCT3
nucleoporin 155kDa	NUP155
methylcrotonoyl-CoA carboxylase 2 (beta)	MCCC2
cleavage stimulation factor, 3' pre-RNA, subunit 3, 77kDa	CSTF3
cyclin-dependent kinase 4	CDK4
chaperonin containing TCP1, subunit 6A (zeta 1)	CCT6A
mitochondrial ribosomal protein L19	MRPL19
Rab geranylgeranyltransferase, beta subunit	RABGGTB
phorbol-12-myristate-13-acetate-induced protein 1	PMAIP1
nicotinamide nucleotide transhydrogenase	NNT
phosphoribosylglycinamide formyltransferase, phosphoribosylglycinamide synthetase, phosphoribosylaminoimidazole synthetase	GART
tubulin folding cofactor E	TBCE
histone deacetylase 2	HDAC2
flap structure-specific endonuclease 1	FEN1
cullin 1	CUL1
torsin family 1, member A (torsin A)	TOR1A
nucleoporin like 2	NUPL2
primase, DNA, polypeptide 1 (49kDa)	PRIM1
cytoskeleton associated protein 5	CKAP5
ubiquitin protein ligase E3C	UBE3C
zinc finger protein 267	ZNF267
adenosine deaminase, RNA-specific	ADAR
signal transducer and activator of transcription 1, 91kDa	STAT1
transcription factor CP2	TFCP2
inositol polyphosphate-4-phosphatase, type I, 107kDa	INPP4A
importin 9	IPO9
zinc finger protein 780A	ZNF780A
prohibitin	PHB
cathepsin C	CTSC
serpin peptidase inhibitor, clade E (nexin, plasminogen activator inhibitor type 1), member 1	SERPINE1
farnesyltransferase, CAAX box, alpha	FNTA
proteasome (prosome, macropain) subunit, beta type, 3	PSMB3
RNA terminal phosphate cyclase-like 1	RCL1
phosphoribosyl pyrophosphate amidotransferase	PPAT
cyclin D2	CCND2
DEAD (Asp-Glu-Ala-Asp) box polypeptide 58	DDX58
COP9 constitutive photomorphogenic homolog subunit 2 (Arabidopsis)	COPS2
high-mobility group 20A	HMG20A
solute carrier family 5 (sodium-dependent vitamin transporter), member 6	SLC5A6
NTF2-like export factor 1	NXT1
sterile alpha motif and leucine zipper containing kinase AZK	ZAK
zinc finger protein 146	ZNF146
SWI/SNF-related, matrix-associated actin-dependent regulator of chromatin, subfamily a, containing DEAD/H box 1	SMARCAD1
zinc finger protein 234	ZNF234
polyribonucleotide nucleotidyltransferase 1	PNPT1
FK506 binding protein 4, 59kDa	FKBP4
ubiquitin carboxyl-terminal hydrolase L5	UCHL5
ATP-binding cassette, sub-family F (GCN20), member 2	ABCF2
pseudouridylate synthase 1	PUS1
SEH1-like (S. cerevisiae)	SEH1L
myelin protein zero-like 1	MPZL1
neurolysin (metallopeptidase M3 family)	NLN
activating signal cointegrator 1 complex subunit 3	ASCC3
mannosidase, endo-alpha	MANEA
glutaminase	GLS
GrpE-like 1, mitochondrial (E. coli)	GRPEL1
glucosamine-6-phosphate deaminase 1	GNPDA1
coiled-coil domain containing 99	CCDC99
protein tyrosine phosphatase-like A domain containing 1	PTPLAD1
transmembrane protein 48	TMEM48
F-box protein 22	FBXO22
NudC domain containing 1	NUDCD1
GTP-binding protein 10 (putative)	GTPBP10
glutamine and serine rich 1	QSER1
coiled-coil domain containing 77	CCDC77
syntaxin 6	STX6
DnaJ (Hsp40) homolog, subfamily B, member 6	DNAJB6
2'-5'-oligoadenylate synthetase 3, 100kDa	OAS3
guanylate binding protein 4	GBP4
solute carrier family 25, member 36	SLC25A36
FYVE, RhoGEF and PH domain containing 6	FGD6
suppressor of cytokine signaling 1	SOCS1
polypyrimidine tract binding protein 2	PTBP2
poly (ADP-ribose) polymerase family, member 12	PARP12
guanylate binding protein 5	GBP5
adaptor-related protein complex 3, mu 1 subunit	AP3M1
hippocampus abundant transcript 1	HIAT1
zinc finger protein 614	ZNF614
ethanolamine kinase 1	ETNK1
WW domain binding protein 11	WBP11
G-rich RNA sequence binding factor 1	GRSF1
chromobox homolog 1	CBX1
coproporphyrinogen oxidase	CPOX
TIA1 cytotoxic granule-associated RNA binding protein	TIA1
eukaryotic translation initiation factor 2B, subunit 1 alpha, 26kDa	EIF2B1
WD repeat domain 3	WDR3
ATPase, H+ transporting, lysosomal 56/58kDa, V1 subunit B2	ATP6V1B2
Fc fragment of IgG, low affinity IIa, receptor (CD32)	FCGR2A
multiple inositol-polyphosphate phosphatase 1	MINPP1
DnaJ (Hsp40) homolog, subfamily A, member 3	DNAJA3
UPF3 regulator of nonsense transcripts homolog B (yeast)	UPF3B
general transcription factor IIIC, polypeptide 3, 102kDa	GTF3C3
FtsJ homolog 2 (E. coli)	FTSJ2
translocase of inner mitochondrial membrane 23 homolog (yeast)	TIMM23
protein regulator of cytokinesis 1	PRC1
leucine-rich PPR-motif containing	LRPPRC
FAST kinase domains 1	FASTKD1
Rac GTPase activating protein 1	RACGAP1
calcium/calmodulin-dependent protein kinase kinase 2, beta	CAMKK2
centrosomal protein 152kDa	CEP152
transmembrane protein 33	TMEM33
anaphase promoting complex subunit 7	ANAPC7
exosome component 5	EXOSC5
McKusick-Kaufman syndrome	MKKS
cornichon homolog 4 (Drosophila)	CNIH4
proline synthetase co-transcribed homolog (bacterial)	PROSC
STAM binding protein	STAMBP
glycosyltransferase 25 domain containing 1	GLT25D1
Ras association (RalGDS/AF-6) domain family member 4	RASSF4
huntingtin interacting protein 1	HIP1
Fc fragment of IgG, high affinity Ib, receptor (CD64)	FCGR1B
mitogen-activated protein kinase kinase 4	MAP2K4
grancalcin, EF-hand calcium binding protein	GCA
myeloid cell nuclear differentiation antigen	MNDA
CD14 molecule	CD14
citrate synthase	CS
mitochondrial ribosomal protein L24	MRPL24
solute carrier family 25 (mitochondrial carrier; peroxisomal membrane protein, 34kDa), member 17	SLC25A17
leucyl-tRNA synthetase	LARS
dihydropyrimidinase-like 2	DPYSL2
thrombospondin 2	THBS2
UTP14, U3 small nucleolar ribonucleoprotein, homolog A (yeast)	UTP14A
partner and localizer of BRCA2	PALB2
isocitrate dehydrogenase 1 (NADP+), soluble	IDH1
YEATS domain containing 2	YEATS2
DnaJ (Hsp40) homolog, subfamily C, member 14	DNAJC14
phosphatidylinositol glycan anchor biosynthesis, class M	PIGM
SMG1 homolog, phosphatidylinositol 3-kinase-related kinase (C. elegans)	SMG1
adaptor-related protein complex 3, mu 2 subunit	AP3M2
zinc finger protein 140	ZNF140
Fc fragment of IgE, high affinity I, receptor for; gamma polypeptide	FCER1G
ribulose-5-phosphate-3-epimerase	RPE
Sec61 alpha 2 subunit (S. cerevisiae)	SEC61A2
transmembrane protein with EGF-like and two follistatin-like domains 1	TMEFF1
DEAD (Asp-Glu-Ala-Asp) box polypeptide 47	DDX47
S100P binding protein	S100PBP
neurofibromin 1	NF1
ras homolog gene family, member T1	RHOT1
chemokine (C-C motif) ligand 4	CCL4
thioredoxin domain containing 12 (endoplasmic reticulum)	TXNDC12
myoneurin	MYNN
granzyme A (granzyme 1, cytotoxic T-lymphocyte-associated serine esterase 3)	GZMA
perforin 1 (pore forming protein)	PRF1
RNA binding motif protein 28	RBM28
TYRO protein tyrosine kinase binding protein	TYROBP
armadillo repeat containing 1	ARMC1
integrator complex subunit 8	INTS8
transmembrane protein 168	TMEM168
non-SMC condensin II complex, subunit D3	NCAPD3
tubulin tyrosine ligase-like family, member 4	TTLL4
periostin, osteoblast specific factor	POSTN
O-sialoglycoprotein endopeptidase-like 1	OSGEPL1
coatomer protein complex, subunit zeta 1	COPZ1
microtubule associated monoxygenase, calponin and LIM domain containing 2	MICAL2
kinesin family member 18A	KIF18A
G-protein signaling modulator 2	GPSM2
CD80 molecule	CD80
staphylococcal nuclease and tudor domain containing 1	SND1
centrosomal protein 170kDa	CEP170
UTP6, small subunit (SSU) processome component, homolog (yeast)	UTP6
exportin 5	XPO5
zinc finger protein 512	ZNF512
cysteine-rich secretory protein LCCL domain containing 2	CRISPLD2
cleavage and polyadenylation specific factor 3, 73kDa	CPSF3
growth arrest-specific 2 like 3	GAS2L3
regulator of chromosome condensation 2	RCC2
zinc finger protein 317	ZNF317
tyrosine 3-monooxygenase/tryptophan 5-monooxygenase activation protein, gamma polypeptide	YWHAG
integrator complex subunit 7	INTS7
dehydrogenase E1 and transketolase domain containing 1	DHTKD1
elongation protein 3 homolog (S. cerevisiae)	ELP3
hepatitis A virus cellular receptor 2	HAVCR2
zinc finger protein 532	ZNF532
proprotein convertase subtilisin/kexin type 6	PCSK6
NMDA receptor regulated 2	NARG2
solute carrier family 30 (zinc transporter), member 6	SLC30A6
ribosomal protein L7-like 1	RPL7L1
family with sequence similarity 105, member B	FAM105B
ankyrin repeat and IBR domain containing 1	ANKIB1
prohibitin pseudogene	LOC494150
zinc finger protein 260	ZNF260
transmembrane protein 69	TMEM69
