# Supplementary material for: Gene Expression Profiles in Peripheral Blood Mononuclear Cells of Chinese Nickel Refinery Workers with High Exposures to Nickel and Control Subjects
Source: Oxford University Press journal article supplement (doi:10.1158/1055-9965.epi-12-1011), 2012-11-29
Supplement: 10559965epi121011-sup-tab3.xlsx [file 10559965epi121011-sup-tab3.xlsx]

## Sheet: Sheet1
Gene name	Gene Symbol	Fold-change	Adjusted p-value
period homolog 1 (Drosophila)	PER1	1.93	0.000200566
flap structure-specific endonuclease 1	FEN1	1.27	0.00287807
8-oxoguanine DNA glycosylase	OGG1	0.86	0.0342158
damage-specific DNA binding protein 2, 48kDa	DDB2	0.84	0.0254359
Fanconi anemia, complementation group F	FANCF	0.82	0.0180726
MUS81 endonuclease homolog (S. cerevisiae)	MUS81	0.8	0.0283454
general transcription factor IIH, polypeptide 4, 52kDa	GTF2H4	0.79	0.0205183
partner and localizer of BRCA2	PALB2	0.78	0.00384255
replication protein A1, 70kDa	RPA1	0.77	0.00171172
DNA cross-link repair 1A	DCLRE1A	0.75	0.00501228
nonhomologous end-joining factor 1	NHEJ1	0.74	0.00659447
uracil-DNA glycosylase	UNG	0.73	0.00150444
MRE11 meiotic recombination 11 homolog A (S. cerevisiae)	MRE11A	0.72	0.0281836
APEX nuclease (apurinic/apyrimidinic endonuclease) 2	APEX2	0.72	0.000191516
general transcription factor IIH, polypeptide 3, 34kDa	GTF2H3	0.72	0.0159003
PRP19/PSO4 pre-mRNA processing factor 19 homolog (S. cerevisiae)	PRPF19	0.71	0.000485705
RAD50 homolog (S. cerevisiae)	RAD50	0.7	0.00871306
ataxia telangiectasia mutated	ATM	0.7	0.00686793
X-ray repair complementing defective repair in Chinese hamster cells 5 (double-strand-break rejoining)	XRCC5	0.69	0.00271725
proliferating cell nuclear antigen	PCNA	0.68	0.00583783
protein kinase, DNA-activated, catalytic polypeptide	PRKDC	0.67	0.00907864
damage-specific DNA binding protein 1, 127kDa	DDB1	0.67	0.00219969
CDC-like kinase 2	CLK2	0.67	0.00102966
RecQ protein-like (DNA helicase Q1-like)	RECQL	0.63	0.00738779
general transcription factor IIH, polypeptide 1, 62kDa	GTF2H1	0.62	0.000279526
poly (ADP-ribose) polymerase 1	PARP1	0.62	0.00107794
mutS homolog 2, colon cancer, nonpolyposis type 1 (E. coli)	MSH2	0.6	0.00330903
replication protein A2, 32kDa	RPA2	0.59	0.000138035
helicase-like transcription factor	HLTF	0.57	0.00031862
tumor protein p53	TP53	0.52	8.87e-05
polymerase (DNA directed), eta	POLH	0.52	4.21e-05
