# Supplementary material for: Gene Expression Profiles in Peripheral Blood Mononuclear Cells of Chinese Nickel Refinery Workers with High Exposures to Nickel and Control Subjects
Source: Oxford University Press journal article supplement (doi:10.1158/1055-9965.epi-12-1011), 2012-11-29
Supplement: 10559965epi121011-sup-tab4.xlsx [file 10559965epi121011-sup-tab4.xlsx]

## Sheet: Sheet1
Gene name	Gene Symbol	Fold-change	Adjusted p-value
jumonji domain containing 6	JMJD6	1.38	0.0105191
enhancer of zeste homolog 2 (Drosophila)	EZH2	1.26	0.032802
MYST histone acetyltransferase 2	MYST2	1.23	0.0271138
PR domain containing 5	PRDM5	1.14	0.02042
euchromatic histone-lysine N-methyltransferase 1	EHMT1	0.84	0.0456355
euchromatic histone-lysine N-methyltransferase 2	EHMT2	0.82	0.0187462
protein arginine methyltransferase 7	PRMT7	0.8	0.0253679
TAF1 RNA polymerase II, TATA box binding protein (TBP)-associated factor, 250kDa	TAF1	0.79	0.0130186
DNA (cytosine-5-)-methyltransferase 1	DNMT1	0.77	0.00613564
histone deacetylase 2	HDAC2	0.77	0.0314427
SET domain, bifurcated 2	SETDB2	0.76	0.0367466
MYST histone acetyltransferase 1	MYST1	0.75	0.014265
histone deacetylase 8	HDAC8	0.71	0.000972815
SET domain, bifurcated 1	SETDB1	0.7	0.0107314
histone deacetylase 1	HDAC1	0.68	0.000312506
protein arginine methyltransferase 5	PRMT5	0.64	0.000277783
helicase-like transcription factor	HLTF	0.57	0.00031862
