# Supplementary material for: Gene Expression Profiles in Peripheral Blood Mononuclear Cells of Chinese Nickel Refinery Workers with High Exposures to Nickel and Control Subjects
Source: Oxford University Press journal article supplement (doi:10.1158/1055-9965.epi-12-1011), 2012-11-29
Supplement: 10559965epi121011-sup-tab5.xlsx [file 10559965epi121011-sup-tab5.xlsx]

## Sheet: Sheet1
Gene Name	Gene Symbol
glycoprotein (transmembrane) nmb	GPNMB
legumain	LGMN
disabled homolog 2, mitogen-responsive phosphoprotein (Drosophila)	DAB2
disabled homolog 2, mitogen-responsive phosphoprotein (Drosophila)	DAB2
cystatin C	CST3
selenoprotein P, plasma, 1	SEPP1
transforming growth factor, beta-induced, 68kDa	TGFBI
CD14 molecule	CD14
ribonuclease, RNase A family, 1 (pancreatic)	RNASE1
serpin peptidase inhibitor, clade F (alpha-2 antiplasmin, pigment epithelium derived factor), member 1	SERPINF1
dihydrofolate reductase	DHFR
fucosidase, alpha-L- 1, tissue	FUCA1
death-associated protein kinase 1	DAPK1
coagulation factor XIII, A1 polypeptide	F13A1
colony stimulating factor 3 receptor (granulocyte)	CSF3R
CD163 molecule	CD163
heme oxygenase (decycling) 1	HMOX1
deafness, autosomal dominant 5	DFNA5
histamine N-methyltransferase	HNMT
stabilin 1	STAB1
adenylate kinase 4	AK4
apolipoprotein C-I	APOC1
interferon-induced protein 44-like	IFI44L
versican	VCAN
versican	VCAN
V-set and immunoglobulin domain containing 4	VSIG4
fibrinogen-like 2	FGL2
chemokine (C-C motif) receptor 1	CCR1
ribonuclease, RNase A family, 4	RNASE4
ficolin (collagen/fibrinogen domain containing) 1	FCN1
heparan sulfate (glucosamine) 3-O-sulfotransferase 1	HS3ST1
CD1d molecule	CD1D
c-mer proto-oncogene tyrosine kinase	MERTK
carboxypeptidase M	CPM
CD33 molecule	CD33
adenosine A3 receptor	ADORA3
phospholipase A2, group VII (platelet-activating factor acetylhydrolase, plasma)	PLA2G7
neuregulin 1	NRG1
retinoic acid receptor responder (tazarotene induced) 1	RARRES1
immunoglobulin superfamily, member 6	IGSF6
CD36 molecule (thrombospondin receptor)	CD36
C-type lectin domain family 10, member A	CLEC10A
erythrocyte membrane protein band 4.1-like 3	EPB41L3
pirin (iron-binding nuclear protein)	PIR
carboxypeptidase, vitellogenic-like	CPVL
FBJ murine osteosarcoma viral oncogene homolog	FOS
tetraspanin 4	TSPAN4
intersectin 1 (SH3 domain protein)	ITSN1
insulin-like growth factor 1 (somatomedin C)	IGF1
CD36 molecule (thrombospondin receptor)	CD36
Ras and Rab interactor 2	RIN2
peripheral myelin protein 22	PMP22
leukocyte immunoglobulin-like receptor, subfamily B (with TM and ITIM domains), member 2	LILRB2
hepatocyte growth factor (hepapoietin A; scatter factor)	HGF
versican	VCAN
fibronectin 1	FN1
histamine N-methyltransferase	HNMT
erythrocyte membrane protein band 4.1-like 3	EPB41L3
potassium channel tetramerisation domain containing 12	KCTD12
potassium channel tetramerisation domain containing 12	KCTD12
aldehyde dehydrogenase 1 family, member A1	ALDH1A1
fibronectin 1	FN1
WD repeat and FYVE domain containing 3	WDFY3
erythrocyte membrane protein band 4.1-like 3	EPB41L3
olfactomedin-like 2B	OLFML2B
Fc fragment of IgG, high affinity Ib, receptor (CD64)	FCGR1B
formyl peptide receptor 3	FPR3
tumor necrosis factor receptor superfamily, member 21	TNFRSF21
macrophage scavenger receptor 1	MSR1
solute carrier family 38, member 6	SLC38A6
CD163 molecule	CD163
versican	VCAN
chemokine (C-C motif) ligand 2	CCL2
complement component 1, q subcomponent, A chain	C1QA
v-maf musculoaponeurotic fibrosarcoma oncogene homolog B (avian)	MAFB
platelet derived growth factor C	PDGFC
tumor necrosis factor receptor superfamily, member 21	TNFRSF21
phosphotyrosine interaction domain containing 1	PID1
ArfGAP with dual PH domains 2	ADAP2
sialic acid binding Ig-like lectin 1, sialoadhesin	SIGLEC1
solute carrier family 47, member 1	SLC47A1
membrane-spanning 4-domains, subfamily A, member 4	MS4A4A
membrane-spanning 4-domains, subfamily A, member 6A	MS4A6A
heparan sulfate (glucosamine) 3-O-sulfotransferase 2	HS3ST2
calcium channel, voltage-dependent, alpha 2/delta subunit 3	CACNA2D3
toll-like receptor 7	TLR7
transmembrane protein 176B	TMEM176B
toll-like receptor 8	TLR8
collectin sub-family member 12	COLEC12
N-acetylneuraminate pyruvate lyase (dihydrodipicolinate synthase)	NPL
C-type lectin domain family 7, member A	CLEC7A
versican	VCAN
tensin 1	TNS1
KIAA1598	KIAA1598
Kruppel-like factor 4 (gut)	KLF4
retinoic acid receptor responder (tazarotene induced) 1	RARRES1
SH3-domain binding protein 4	SH3BP4
stabilin 1	STAB1
